1 **Co-circulation of multiple influenza A variants in swine**  
2 **harboring genes from seasonal human and swine**  
3 **influenza viruses**

4 Pia Ryt-Hansen<sup>1,2\*</sup>, Jesper Schak Krog<sup>3</sup>, Solvej Østergaard Breum<sup>3</sup>, Charlotte Kristiane Hjulsager<sup>3</sup>, Anders  
5 Gorm Pedersen<sup>4</sup>, Ramona Trebbien<sup>3</sup> and Lars Erik Larsen<sup>1,2</sup>

6 <sup>1</sup> Technical University of Denmark, National Veterinary Institute, Kemitovet building 204, 2700 Kgs.  
7 Lyngby, Denmark; [piarh@sund.ku.dk](mailto:piarh@sund.ku.dk), [lael@sund.ku.dk](mailto:lael@sund.ku.dk)

8 <sup>2</sup> University of Copenhagen, Department of Health Sciences, Institute for Animal and Veterinary Sciences  
9 1870 Frederiksberg C, Denmark; [piarh@sund.ku.dk](mailto:piarh@sund.ku.dk), [lael@sund.ku.dk](mailto:lael@sund.ku.dk)

10 <sup>3</sup> Statens Serum Institut, Artillerivej 5, 2300 Copenhagen S, Denmark; [jskr@ssi.dk](mailto:jskr@ssi.dk), [sobr@ssi.dk](mailto:sobr@ssi.dk),  
11 [ckhj@ssi.dk](mailto:ckhj@ssi.dk), [ratr@ssi.dk](mailto:ratr@ssi.dk)

12 <sup>4</sup> Department of Health Technology, Section for Bioinformatics, Technical University of Denmark,  
13 Kemitovet Building 204, DK-2800 Kongens Lyngby, Denmark; [agpe@dtu.dk](mailto:agpe@dtu.dk)

14 \* Corresponding author

15

16

17

18

19

20

21

22

23

24

25 **Abstract**

26 Since the influenza pandemic in 2009, there has been an increased focus on swine influenza A virus (swIAV)  
27 surveillance. This paper describes the results of the surveillance of swIAV in Danish swine from 2011 to  
28 2018.

29 In total, 3800 submissions were received with a steady increase in swIAV positive submissions, reaching  
30 56% in 2018. Ten different swIAV subtypes were detected. Full genome sequences were obtained from 129  
31 swIAV positive samples. Altogether, 17 different circulating genotypes were identified including novel  
32 reassortants and subtypes harboring human seasonal IAV gene segments. The phylogenetic analysis revealed  
33 substantial genetic drift and also evidence of positive selection occurring mainly in antigenic sites of the  
34 hemagglutinin protein and confirmed the presence of a swine divergent cluster among the H1pdm09Nx  
35 viruses.

36 The results provide essential data for the control of swIAV in pigs and for early detection of novel swIAV  
37 strains with zoonotic potential.

38

## 39 Introduction

40 Influenza A virus (swIAV) infection in swine causes respiratory disease, impairs the growth rate and  
41 increases the risk of secondary infections<sup>1-3</sup>. SwIAV is enzootic globally and multiple subtypes and lineages  
42 have been identified<sup>4</sup>. The influenza A virus genome consists of eight distinct gene segments and subtypes  
43 are assigned by characterizing the two surface glycoproteins hemagglutinin (HA) and neuraminidase (NA)<sup>5</sup>.

44 Pigs are infected by the same subtypes as humans, including H1N1, H1N2 and H3N2<sup>6</sup>. The transmission of  
45 H1N1 avian influenza A virus (IAV) to swine in the 1970s created the H1N1 Eurasian swine lineage also  
46 called “avian-like swine H1N1” (1.C lineage<sup>7</sup>) circulating in Europe and Asia<sup>8</sup>. An H3N2 influenza virus  
47 related to a human strain from 1973 started to circulate in the European pig populations in 1984. In the mid-  
48 1980s, a reassortment between the avian-like swine H1N1 and H3N2 human virus resulted in a human-like  
49 reassortant swine “H3N2sw” that became established in European swine<sup>9,10</sup>. In 1994, a H1N2 reassortant  
50 (1.B lineage) comprising an HA gene from human seasonal H1N1, an NA gene from H3N2sw and internal  
51 genes originating from avian-like swine H1N1 was first identified in the United Kingdom and subsequently  
52 detected in many European countries<sup>11</sup>. This swIAV lineage is also known as European human-like  
53 “H1huN2”. However, this subtype has never been detected in Danish pigs. In the beginning of the 2000s, a  
54 new “H1N2dk” reassortant virus was identified in Danish pigs<sup>12</sup>. This H1N2dk virus comprised an avian-like  
55 swine HA gene and an NA from contemporary, circulating H3N2sw and has since been identified in several  
56 European countries<sup>13,14,15,16</sup>.

57 In 2009, a novel IAV identified as pandemic H1N1/2009 strain of influenza A (1A.3.3.2 lineage -  
58 H1N1pdm09) spread rapidly among humans worldwide. The H1N1pdm09 virus is a reassortant, which  
59 obtained most of its gene segments from the triple-reassortant swIAV circulating in North American swine,  
60 its NA and matrix (M) gene segments from the Eurasian avian-like swine H1N1 lineage<sup>17,18</sup> and had its  
61 origin in the Mexican swine population<sup>19</sup>. Soon after the virus began to spread globally in humans, its  
62 introduction into the swine population was noticed in several countries<sup>15,20-22</sup>. In transmission experiments,  
63 the high susceptibility of pigs to H1N1pdm09 infection was confirmed as well as an efficient pig-to-pig  
64 transmission<sup>23</sup>. This instantly raised concerns about the possible generation of new reassortants between  
65 H1N1pdm09 virus and circulating swIAV lineages, which soon after was indeed found to have occurred in  
66 several countries, including Denmark<sup>15,24-27</sup>. Consequently, there is a risk for the development of novel and  
67 more virulent progeny virus capable of infecting humans.

68 Surveillance of swIAV in pigs concerns both animal and public health. For animal health, the documentation  
69 of enzootic and new emerging swIAV and their ecology is important for control of disease and to ensure the  
70 use of adequate diagnostic tools. From a public health point-of-view, the results are important for risk  
71 assessments of emerging IAV, resistance to antiviral drugs or increased pathogenicity as well as pandemic

72 preparedness. Here we report the results of a passive surveillance program of swIAV conducted in Denmark  
73 from 2011 to 2018, including data on intensive subtyping and genetic characterization of swIAV positive  
74 submissions.

## 75 **Results**

### 76 *Field samples*

77 The total number of submissions received for swIAV diagnostics from pigs with acute respiratory disease in  
78 the years 2011 to 2018 fluctuated over the years, with a peak in 2015 (Fig. 1). In total, 3800 submissions  
79 were received over eight years. The pattern of monthly submissions was very similar from year to year  
80 showing a peak in the number of submissions from October to March (autumn and winter months) (Fig. 1).  
81 When comparing the number of swine herds submitting samples for swIAV diagnostics each year (n=276-  
82 488) with the total number of swine herds present in Denmark the same year (n=2741-4529)<sup>28</sup>, it was evident  
83 that 6-15% of the Danish swine herds were included in the surveillance with a steady increase over the years.

### 84 *SwIAV positive samples*

85 In 2011, the first year of the surveillance, 36 % of the total submissions contained at least one positive  
86 sample. In the following five years (2012-2016), the percentage of swIAV positive submissions was stable  
87 ranging between 44-47 %, but, an increase in the percentage of swIAV positive submission was observed  
88 over the last two years, reaching 56 % in 2018 (Fig. 2). However, it should be noted that the average number  
89 of samples per submission was higher in 2018, with an average of 2.9 samples per submission compared to  
90 2-2.3 the previous years (2011-2017) (data not shown). The monthly distribution of swIAV positive  
91 submissions was fluctuating, but no consistent seasonal variations were observed (Supplementary figure 1).  
92 The average monthly percentage of positive submission over the eight years ranged from 42.6-51.8 % with  
93 the highest average percentages in April, September and December. There was no significant difference  
94 between the average percentage of positive submissions between the different months, with the exception of  
95 April (average percentage of positive submissions = 51.6 %, SD: 6.5) and August (average percentage of  
96 positive submissions = 42.6 %, SD: 8.9) (p=0.04).

### 97 *Test for the HA gene of H1N1pdm09 origin by specific real time PCR*

98 Due to the global spread of H1N1pdm09 virus in humans, it was decided in 2011 to test all swIAV positive  
99 samples from Danish pigs specifically for the presence of the HA gene of H1N1pdm09 origin (H1pdm09). In  
100 2011, 21 % of the swIAV positive submissions, tested positive for H1pdm09. However, in the two following  
101 years the percentage decreased to 14-16 % of the swIAV positive submissions. This decrease reverted in  
102 2014, where a marked increase was observed, and since then, the proportion of H1pdm09 remained at a

103 stable level, ranging between 20-26 % of the swIAV positive submissions (Fig. 3). On average over the eight  
104 years, H1pdm09 positive submissions constituted 15-25% of the monthly swIAV positive submissions  
105 (Supplementary figure 1). The months with the highest proportion of H1pdm09 positive submissions were  
106 February, March and July. However, no significant differences ( $p$  value  $>0.05$ ) in the average proportions of  
107 H1pdm09 positive submissions between the different months were observed.

#### 108 *SwIAV subtypes*

109 During the years 2011-2014, 33-48 % of the swIAV positive submissions were subtyped by partial  
110 sequencing of the HA and NA surface genes. From 2015 and onwards, the swIAV positive submissions was  
111 subtyped by multiplex RT-PCR and/or by Fluidigm, resulting in an increase of successfully subtyped  
112 submissions to 61-77 % of the total number of swIAV positive submissions (data not shown).

113 The most prevalent subtype identified in the swIAV positive submissions during the eight years (2011-2018),  
114 was H1N2dk. The proportion of H1N2dk increased steadily from 42 % of the subtyped submissions in 2012  
115 to 69 % of the subtyped submissions in 2018. In contrast, the avian-like swine H1N1, which was highly  
116 prevalent in 2011-2012 representing between 30-37 % of the subtyped submissions, decreased markedly  
117 since then, only representing 5% of the swIAV subtyped submissions in 2018 (Fig. 4).

118 The proportion of H1N1pdm09 was relatively stable from 2011-2018 representing approx. 16 % of the  
119 subtyped submissions. However, in 2015 a marked increase was observed when the H1N1pdm09 was  
120 detected in 25.6 % of the subtyped submissions. Several reassortants containing either the HA or the NA  
121 gene of the H1N1pdm09 subtype, were identified. The most prevalent of these reassortants was the  
122 “H1pdmN2sw”, which combined the HA gene of the H1N1pdm09 subtype and the NA gene of the H1N2dk  
123 subtype. This subtype was detected for the first time in Denmark in 2011, and since then, the proportion of  
124 this subtype remained relatively stable constituting around 4 % of the subtyped submissions each year.  
125 However, in the years 2016 and 2018 a doubling in prevalence of H1pdmN2sw was observed. Another  
126 reassortant, also detected for the first time in 2011, was the “H1pdmN2hu”, which contained an HA gene of  
127 H1N1pdm09 origin, and an NA gene derived from the human seasonal flu circulating in the 90’s. This  
128 subtype was identified with low prevalence (1-3.2 %) from 2011-2017, but was interestingly not detected, in  
129 the years where the prevalence of H1pdmN2sw peaked (2016 and 2018). In 2018, two novel swIAV  
130 subtypes were identified, both including one surface gene of H1N1pdm09 origin. One was termed  
131 “H1avN1pdm” and had an avian-like swine HA gene and an NA gene of H1N1pdm09 origin. The other  
132 novel subtype was termed “H1pdmN1av” and carried an HA gene of H1N1pdm09 origin and an NA gene  
133 derived from the avian-like swine H1N1 (Fig. 4).

134 The swine-adapted reassortant H3N2sw was detected in a few samples in 2013-2014, but was not detected in  
135 2015-2018. However, another H3N2 reassortant “H3hu05N2sw”, containing an HA gene of human seasonal  
136 origin from 2005 and an NA gene of the H1N2dk subtype, has been detected each year since 2013, with the  
137 exception of 2017<sup>26</sup>. Another reassortant, containing the N2 gene of the human seasonal H3N2 subtype, was  
138 detected for the first time in Denmark in 2011 and was termed “H1avN2hu”<sup>29</sup>. This subtype carried an avian-  
139 like swine HA gene and an NA gene derived from the human seasonal flu circulating in the 90’s. The  
140 H1avN2hu subtype has been detected each year, with the exception of 2016 (Fig. 4).

141 In summary, six novel swIAV reassortant subtypes (H1pdmN2sw, H1pdmN2hu, H1pdmN1av, H1avN1pdm,  
142 H3hu05N2sw and H1avN2hu) were discovered through the Danish surveillance of swIAV from 2011-2018  
143 (Fig. 4). However, the diversity of circulating strains is even more complex, when all gene segments are  
144 included in the analyses as described below.

#### 145 *Full genome sequencing*

146 In total, 128 full genome sequences of swIAV isolated between 2013-2018 were uploaded in GenBank with  
147 the following accession numbers: MT666225 - MT667233. The accessions numbers, corresponding sample  
148 IDs and information on the lineage of each gene segments are summarized in Supplementary table 2. The  
149 characteristics of the H3hu05N2sw subtype (isolate 2014\_15164\_1p1\_H3hu05N2sw accession number:  
150 EPI\_ISL\_247092) has previously been described<sup>26</sup>, but was also included in the analysis of the H3hu genes  
151 of this study.

#### 152 *Hemagglutinin gene characterization*

153 In total, 78 H1av, 48 H1pdm09 and three H3hu05 full-length HA sequences were obtained and analyzed  
154 separately according to the lineage.

155 The H1av nucleotide sequences were fairly diverse, with an average pairwise sequence difference per site  
156 ( $\pi$ ) of 0.099, SE: 0.0005. Phylogenetic trees constructed either with or without clock-models  
157 (Supplementary figure 2, Figure 5), did not display the imbalanced, ladder-like structure typical for influenza  
158 trees. The tree contained several clusters and one cluster (Cluster 6, Figure 5) that was dominated by  
159 H1avNx strains carrying a complete internal gene cassette of H1N1pdm09 origin. There was low correlation  
160 between sampling time and genetic divergence (Table 2).

161 Analysis using CODEML indicated strong evidence for positive selection among the H1av sequences.  
162 Specifically, the dN/dS ratios for individual codons under the M2a model strongly suggested the presence of  
163 positive selection in four positions, all located in the globular head of the HA protein and all in previously  
164 defined antigenic sites (Table 2).

165 The H1pdm09 nucleotide sequences had a lower nucleotide diversity:  $\pi = 0.043$ , SE 0.0005. Both the clock  
166 and non-clock trees for H1pdm09 sequences isolated from Danish pigs, showed that 30 of the sequences  
167 were located in a well-defined cluster (Cluster 1; Fig. 6 and Supplementary figure 3), with the remaining 18  
168 sequences branching out basally to this cluster (Fig. 6 and Supplementary figure 3). The 30 H1pdm09  
169 sequences of Cluster 1 were collected between 2015-2018, whereas the 18 H1pdm09 sequences outside this  
170 cluster were collected between 2013-2017 (Fig. 6). The strict molecular clock tree and the TempEst analysis  
171 of all the Danish H1pdm09 sequences suggested that the sequences evolved according to time with stable  
172 substitution rate of  $4.9 \times 10^{-3}$  per site per year (Fig. 6 and Table 2). The diversion into the Cluster 1 appeared  
173 to have occurred around 2011, however the most recent common ancestor for the sequences in Cluster 1 was  
174 dated around 2014 (Fig. 6). In the phylogenetic tree that also included representative swine and human  
175 seasonal H1pdm09 sequences, it was found that Cluster 1 only contained swine derived H1pdm09  
176 sequences, while sequences outside of this cluster was a mix of swine and human seasonal H1pdm09  
177 sequences. Cluster 1 was therefore termed the swine like “Sw-L cluster” (Fig. 7 – Sw-L cluster – taxon  
178 suffix Sw-L). The remaining 18 Danish swIAV sequences were termed human like “Hu-L” H1pdm09  
179 sequences (Fig. 7 - taxon suffix Hu-L).

180 The initial analysis of the Danish H1pdm09 aa sequences revealed a total of 20 aa positions that differed  
181 between the Danish Sw-L and the Danish Hu-L sequences (Table 3) and seven of these 20 aa differences  
182 were specific, meaning that all the 30 Danish Sw-L aa sequences had a different aa compared to all of the 18  
183 Danish Hu-L aa sequences (Bold positions in Table 3). Thirteen of the 20 aa residues defining the Sw-L  
184 protein sequences were located either in previously defined antigenic sites (Ca and Sb) or the receptor  
185 binding site (RBS). Six of these were among the seven “unique” Sw-L positions (Table 3).  
186 Subsequently, the 20 aa residues were compared among all the sequences included in the phylogenetic tree  
187 of Fig 7. These reference aa sequences were divided into three groups; one containing the foreign (non-  
188 Danish) swine H1pdm09 sequences (n=11) included in the “Sw-L cluster”, one containing the European  
189 swine H1pdm09 sequences located outside the Sw-L cluster (n=42) and one containing human seasonal  
190 H1pdm09 sequences (n=59) (Table 3). Interestingly, all the 11 foreign swine H1pdm09 aa sequences  
191 included in the Sw-L cluster, shared exactly the same aa residues as the Danish Sw-L sequences. Similarly,  
192 the majority of the European swine- and human seasonal H1pdm09 aa sequences located outside the Sw-L  
193 cluster carried residues similar to the Danish Hu-L aa sequences, and were different from the sequences  
194 included in the Sw-L cluster (Table 3). Finally, no unique swine or human residues were revealed when all  
195 H1pdm09 proteins derived from swine were compared to the H1pdm09 proteins derived from human  
196 seasonal H1pdm09 viruses. Nonetheless, at position 273, significantly more swine H1pdm09 proteins (91 %)  
197 carried an A compared to the human seasonal H1pdm09 proteins (27 %) ( $p = < 0.05$ ). In summary, the  
198 H1pdm09 proteins derived from Danish pigs were divided into two groups containing “Sw-L” and “Hu-L”  
199 sequences, which were separated by 20 aa differences mainly located in antigenic sites or the RBS. The Sw-



200 L cluster still clustered separately when swine- and human-derived H1pdm09 reference sequences were  
201 included in the alignment, but 11 additional German and Italian H1pdm09 swine-derived sequences were  
202 also part of this cluster.

203 The CODEML analysis for determining the best fitting substitution model revealed that the M2a model fitted  
204 the Danish H1pdm09 sequences significantly better than the M1a model, providing strong evidence for  
205 positive selection occurring in the HA protein. Moreover, the dN/dS ratios for individual codons under the  
206 M2a model strongly suggested the presence of positive selection in nine aa positions all situated in the  
207 globular part of the HA protein and eight located specifically in antigenic sites or in the RBS. The same  
208 analysis was repeated on the Danish Sw-L and Hu-L sequences, separately. Interestingly, these analyses  
209 revealed that positive selection did indeed occur in the Danish Hu-L sequences, as the M2a model fitted the  
210 sequences significantly better than the M1a model. Additionally, the dN/dS ratios for individual codons  
211 under the M2a model strongly suggested the presence of positive selection in 15 different aa positions,  
212 including ten positions located in antigenic sites or the RBS. Conversely, model M1a fitted the Sw-L  
213 sequences significantly better, suggesting that no positive selection occurred among these sequences. The  
214 strict molecular clock and TempEst analysis were also repeated for the Danish Sw-L and Hu-L sequences  
215 separately. Interestingly, the Hu-L sequences had a higher substitution rate and also showed a higher  
216 correlation coefficient in the TempEst analysis compared to the Sw-L sequences (Table 3). In summary,  
217 when analyzing all the H1pdm09 sequences as a whole, positive selection was evident among the sequences.  
218 However, when dividing the H1pdm09 sequences into the Sw-L and Hu-L groups, positive selection was  
219 only evident among the Hu-L H1pdm09 sequences and these sequences also showed a higher substitution  
220 rate compared to the Sw-L sequences.

221 Additionally, differences in N-linked and O-linked glycosylation sites between the Sw-L and Hu-L  
222 H1pdm09 proteins were examined. The results revealed that all proteins of both the Sw-L and Hu-L samples  
223 were predicted to be N-glycosylated at position 28, 40, 304 and 557 (numbering from the first methionine).  
224 In addition, 3/18 Hu-L H1pdm09 proteins were predicted to be N-glycosylated at position 136, which is in  
225 the vicinity of the RBS. Significantly more Sw-L H1pdm09 proteins (80 %) had an O-linked glycosylation  
226 site at position 150 compared to the Hu-L H1pdm09 proteins (11%) ( $p < 0.05$ ). Interestingly, position 150 is  
227 located in the RBS. Conversely, significantly more Hu-L H1pdm09 proteins (44 %) had a O-linked  
228 glycosylation site at position 145 compared to the Sw-L H1pdm09 proteins (3 %) ( $p < 0.05$ ). Position 145 is  
229 also located in the close vicinity of the RBS.

230 Previously defined residues of the HA proteins regarded as important for host-adaptation, pathogenicity,  
231 receptor binding and virulence were examined and compared between subtypes carrying an HA protein of  
232 avian and H1N1pdm09 origin, respectively. The results can be visualized in Supplementary table 3.



233 The three H3 sequences obtained in this study, showed a low nucleotide diversity ( $\pi$ ) of 0.027, SE: 0.002.  
234 The closest human IAV match in NCBI GenBank for all of the three sequences was  
235 “A/Denmark/129/2005(H3N2)” with accession number EU103786. As only three sequences were obtained,  
236 no further phylogenetic or evolutionary analysis were performed.

#### 237 *Neuraminidase characteristics*

238 In total, 32 N1pdm, 14 N1av, 75 N2sw and 8 N2hu full-length NA sequences were obtained and analyzed  
239 separately according to the lineage.

240 The N1pdm nucleotide diversity ( $\pi$ ) was 0.029 SE: 0.0005. The majority of the sequences obtained between  
241 2015-2018 were located in one cluster, whereas the oldest sequences (2013-2014) were located outside the  
242 cluster (Supplementary figure 4). The TempEst analysis showed a high correlation coefficient similar to that  
243 of the H1pdm09 sequences, indicating that the genetic divergence evolved according to time. The Beast  
244 analysis revealed a substitution rate of  $3.9 \times 10^{-3}$  per site per year. However, no evidence of positive selection  
245 was revealed (Table 4).

246 The N1av nucleotide diversity was 0.097, SE: 0.003 similar to the nucleotide diversity of the H1av  
247 nucleotide sequences. No clear clustering was observed in the Bayesian tree (Supplementary figure 5). The  
248 TempEST analysis showed a relative low correlation between the genetic divergence and time, and the Beast  
249 analysis revealed a substitution rate of  $5.9 \times 10^{-3}$  per site per year. No evidence of positive selection was  
250 observed (Table 4).

251 The N2sw nucleotide diversity was 0.08, SE: 0.0005 and the Bayesian analysis revealed six main clusters.  
252 Each cluster contained sequences dispersed over the majority of the surveillance period, suggesting no  
253 temporal clustering. Interestingly, one major cluster only contained HxN2sw from strains having a full or  
254 partial H1N1pdm09 internal gene cassette. Moreover, this cluster contained 28/30 of the same samples as  
255 Cluster 3 of the H1av sequences, which also clustered according to the origin of the internal gene cassette  
256 (Fig. 5 and Supplementary figure 6). The TempEst and Beast analysis revealed a low correlation between  
257 genetic divergence and time, and a substitution rate of  $4.4 \times 10^{-3}$  per site per year. As for the other NA  
258 lineages, no evidence of positive selection was observed (Table 4).

259 The eighth N2hu sequences showed a sequence diversity of 0.085, SE: 0.006 and despite the limited number  
260 of sequences, the Bayesian phylogenetic analysis revealed two main clusters; one containing sequences  
261 derived from subtypes containing a full avian internal gene cassette and one only containing sequences with  
262 a full or partial H1N1pdm09 internal cassette (Supplementary Figure 7). The TempEst analysis revealed a  
263 low correlation between genetic divergence and time, and the low number of sequences resulted in an

264 overestimated substitution rate, which therefore was not included in the results. No evidence of positive  
265 selection was observed (Table 4).

266 All of NA sequences across the different lineages (n=129) were examined for specific aa changes encoding  
267 either neuraminidase resistance or increased virulence. However, none of the NA sequences had any of these  
268 aa changes.

### 269 *The internal gene cassette*

270 In total, 17 different genotypes were identified in this study (Fig. 8). The subtypes H1N2dk, avian-like swine  
271 H1N1 and the H1avN2hu showed the highest number of diverse genotypes, whereas most subtypes including  
272 at least one surface gene of H1N1pdm09 origin had a complete internal gene cassette of H1N1pdm09 origin.  
273 Detailed information on the origin of all gene segments of all individual samples are listed in Supplementary  
274 table 2.

275 All internal gene full length sequences (M, NP, NS, PA, PB1 and PB2) were subjected to individual  
276 Bayesian phylogenetic analysis, which for all gene segments revealed two main clusters; one containing  
277 sequences of avian-like swine H1N1 origin and one of H1N1pdm09 origin (Supplementary figures 8-13).  
278 Generally, there was a clear separation of the two clusters in all the phylogenetic trees. However, three and  
279 two divergent sequences were observed in-between the two main clusters in the M- and PB2 Bayesian tree,  
280 respectively (Supplementary Figure 8 and 13). The two PB2 sequences diverted due to smaller deletions, but  
281 still showed the highest sequence identity to the H1N1pdm09 subtype when performing a BLAST search.  
282 The three M sequences did not contain any deletions and the BLAST search indicated that two of the  
283 sequences (A/swine/Denmark/2013-10-1545-1p1 and A/swine/Denmark/2015-04790-1p1) shared the highest  
284 sequences identity to avian-like swine origin sequences and the third sample (A/sw/Denmark/2015-04811-  
285 10p1) shared the highest sequence identity to H1N1pdm09 origin sequences.

286 Full genome sequencing of the swIAV isolates obtained over the eight years, revealed that since 2013, an  
287 increasing number of the H1N2dk subtypes sequenced had acquired an internal gene cassette of H1N1pdm09  
288 origin (Fig. 9). Similarly, though not as many samples were available, the H1avN2hu also seemed to gain  
289 internal genes of H1N1pdm09 origin over time. In contrast, the avian-like swine H1N1 subtype, roughly  
290 maintained an avian-like swine internal gene cassette, with an exception of three isolates, which contained an  
291 NP gene, an M gene and the NS, NP, PA, PB1 and PB2 genes of H1N1pdm09 origin, respectively. All other  
292 subtypes including at least one surface gene of H1N1pdm09 origin (H1N1pdm09, H1pdmN2sw,  
293 H1avN1pdm09 and H1pdmN1av) contained a complete H1N1pdm09 internal gene cassette, with the  
294 exception of one H1pdmN2sw virus (A/sw/Denmark/2013-10-1325-5p1), which had an avian-like swine M-

295 gene. In addition, all the three full genome sequences of the H3hu05N2sw subtype contained a complete  
296 internal gene cassette of H1N1pdm09 origin (Supplementary table 2).

297 Previously defined important residues of the proteins encoded by the internal gene cassette was analyzed and  
298 the results are summarized in Supplementary table 3. Furthermore, comparisons of the proteins encoded by  
299 the internal gene cassette of the Sw-L and Hu-L H1pdm09Nx viruses were performed and some aa  
300 differences between the two groups were identified. However, none of the aa differences were 100 %  
301 specific to each group (Supplementary Table 4).

## 302 **Discussion**

### 303 *Seasonality*

304 IAV infections in swine has been considered a disease of late autumn and early winter<sup>30-33</sup>, but the results  
305 reported here reveal that while the percentage of samples testing positive for swIAV fluctuate between  
306 months, no significant differences are observed between the different seasons. This supports the recent  
307 studies describing the enzootic persistence of swIAV<sup>34-37</sup>, most likely as a consequence of the herd-sizes and  
308 management procedures under the current conditions of commercial swine herds. A similar lack of  
309 seasonality was found in other countries with comparable management structures<sup>16,33,38</sup>. Inadequate  
310 information on the severity of clinical signs were available for the Danish submissions, but a recent study  
311 from France revealed that the clinical symptoms encountered during the winter months were more severe<sup>39</sup>,  
312 which may explain the observed increase in the number of submissions in the autumn and winter. The  
313 increase in submissions during the autumn and winter may also be explained by the seasonal appearance of  
314 other respiratory pathogens such as mycoplasma and other bacteria<sup>40</sup>. Finally, some veterinarians are still  
315 considering swIAV to be a seasonal disease and are therefore not submitting samples for swIAV testing  
316 during summer. In addition, no seasonality was documented for the prevalence of H1pdm09 positive  
317 submissions, which is in accordance with a recent French study<sup>41</sup>. This could indicate that while  
318 H1N1pdm09 reverse-zoonosis events occurs during the human influenza season, the high level of  
319 H1N1pdm09 circulating in Danish pigs independent of the human influenza season hide the impact observed  
320 on the H1N1pdm09 occurrence during the autumn and winter months.

### 321 *Prevalent subtypes and reassortant swIAV*

322 During the first three years of the surveillance program, the two most common influenza A virus subtypes in  
323 Danish swine were avian-like swine H1N1 and H1N2dk, which harbor the same HA gene. However, soon  
324 after the first introduction of H1N1pdm09 in January 2010, this subtype rapidly spread, and has since 2014  
325 remained the second most prevalent subtype in Denmark. The swIAV subtype H3N2sw has almost  
326 disappeared from Denmark, in line with surveillance data obtained in some other European countries such as

327 the UK and France<sup>16,33</sup>. Conversely, the H1N2dk has been steadily increasing in prevalence since 2012, and  
328 is currently the most dominating subtype in Denmark. Concurrently, the H1N2dk has gradually gained an  
329 internal gene cassette of H1N1pdm09 origin, suggesting that this gene constellation is beneficial for the  
330 virus. In general, an increase in Danish swIAV subtypes carrying an internal gene cassette of H1N1pdm09  
331 origin was observed, which indicates that an internal gene cassette of H1N1pdm09 origin is advantageous,  
332 compared to an avian-like swine H1N1 derived internal gene cassette. The benefit of having a complete or  
333 partial internal gene cassette of H1N1pdm09 origin, could be explained by the polymerase genes having a  
334 better/increased replication efficiency<sup>42</sup>. In addition, certain gene combinations might enhance the  
335 transmissibility of the virus, e.g. the M-gene of H1N1pdm09 origin in combination with the A/Puerto  
336 Rico/8/34 (H1N1) strain shown increased transmissibility in the guinea pig model<sup>43</sup>. Interestingly, based on  
337 the phylogenetic trees, it seems that the internal gene cassette might have an influence on the evolution of the  
338 surface genes, as several clusters among the H1av, N2sw and N2hu sequences correlates with the origins of  
339 the internal gene cassette. However, further studies are needed to investigate how the different gene segment  
340 can influence each other, but it might be related to the specific reassortment event forming a common  
341 ancestor for the cluster. Finally, the replacement of the avian-like swine internal gene cassette with an  
342 H1N1pdm09 internal gene cassette, could enhance the zoonotic potential, as proposed for the American  
343 H3N2v<sup>44</sup> and the British H1N2r<sup>45</sup> subtypes, which have resulted in several human infections. Therefore, the  
344 pandemic potential of swIAV harboring gene segments of H1N1pdm09 origin should be a future research  
345 focus.

346 Six novel reassortant swIAV subtypes and a total of 17 genotypes were identified during the eight-year  
347 surveillance period. These findings underline the importance of having a national swIAV surveillance  
348 program, which acts as an early warning system both for the swine industry and for the human health sector,  
349 ensuring that novel subtypes and variants escaping current vaccines can be quickly identified. The  
350 H3hu05N2sw subtype is a perfect example hereof, as it is a triple-reassortant swIAV including gene  
351 segments from IAV of enzootic swIAV origin, H1N1pdm09 origin and human seasonal IAV origin<sup>26</sup>.  
352 Surprisingly, this subtype has only been sporadically detected during the last five years. A possible  
353 dissemination of this subtype among Danish swine herds would probably have devastating consequences,  
354 because there is no population immunity towards the human seasonal H3hu05<sup>26</sup>. This indicates that other  
355 factors than pre-existing immunity towards the HA protein are important for the spread of novel swIAV  
356 subtypes and strains. Indeed, the most successful virus in Denmark during the last seven years has been the  
357 H1N2dk, despite that there has been a high level of population immunity towards the HA protein of this  
358 subtype since the 90's. Combined with the findings that the internal cassette of H1N1pdm09 origin seems to  
359 benefit viral competitiveness, we might need to change our perception that pre-existing immunity to HA is  
360 the main driver of evolution to focus also on the impact of the internal genes. Two other cases of human  
361 seasonal IAV spillover into the swine population were observed during the surveillance, including the

362 H1avN2hu and H1pdmN2hu subtypes. Both subtypes contain the NA gene of a human seasonal IAV  
363 circulating in the 90'ties<sup>29</sup>. The continued circulation of the H1pdmN2hu subtype in swine is worrying from  
364 a zoonotic perspective, because all eight gene segments of this virus originates from viruses known to be  
365 able to replicate in- and spread between humans. The circulation of the H1avN2hu subtype is even more  
366 worrying, since there is no immunity against the HA protein of this subtype in the human population. The  
367 H1avN2hu has gradually gained the internal cassette of H1N1pdm09 origin, meaning that some of these  
368 viruses contain seven out of eight gene segments, which have been found in human IAV strains and thereby  
369 may lead to increased zoonotic potential. Therefore, it is important to monitor the occurrence of these  
370 subtypes in the future – both in pigs and in humans. Another group of reassortant swIAV, that potentially  
371 pose a problem for the swine herds, are those mixing the surface genes of enzootic swIAV and H1N1pdm09  
372 subtypes. These novel reassortants includes H1pdmN2sw, H1pdmN1av and H1avN1pdm. Swine herds  
373 experiencing infections with one of these three subtypes could potentially have a reduced effect of  
374 vaccination, as no available vaccines currently include both the H1N1pdm09 subtype and the enzootic  
375 swIAV subtypes. Thereby, these farms might need to apply two vaccines to reach an optimal immunity to the  
376 circulating herd strain.

### 377 *Genetic and antigenic drift*

378 Another important aspect of swIAV evolution is the genetic drift, mainly affecting the two surface genes  
379 (HA and NA)<sup>46,47</sup>. Especially the avian-like swine hemagglutinin protein (H1av) seem to have undergone  
380 extensive genetic and antigenic drift, as a great sequence diversity was revealed. It was evident that the  
381 evolution of the H1av gene did not evolve in one specific direction over time, but rather evolved in many  
382 different directions, resulting in a vast number of different H1av clusters and variants. In a recent study<sup>37</sup>, we  
383 found that the evolution of the H1av in a single herd followed a pectinate pattern mirroring the pattern seen  
384 globally for the human seasonal influenza strains, which contradict the general perception that swine IAV is  
385 not prone to selection driven by preexisting immunity like in humans. In the present study, we assessed the  
386 H1av evolution over time in the Danish pig population as a whole and over several years and failed to  
387 confirm this pectinate pattern. Thus, it seem that swIAV evolution at the single herd level is identical to the  
388 pattern seen in the global human population, but when the swIAV evolution is evaluated on a national or  
389 global scale, this pectinate pattern is disrupted. The reason for this difference is probably that the human  
390 population, due to the extensive global interactions, can be regarded as a single “epidemiological unit”,  
391 whereas swine herds, due to a high level of external biosecurity and limited exchange of live animals  
392 between herds, represents a vast variety of closed “epidemiological units”, which each have a specific- and  
393 probably pectinate-pattern of evolution. In other words, the global evolution of swIAV is characterized by a  
394 vast number of different local clusters of viruses that on the herd level evolve similar to human seasonal  
395 influenza viruses. This in turn results in very complex phylogenetic trees with a lot of clusters and

396 subclusters, which disrupt the pectinate structure. Still, despite the lack of a clear pectinate like evolution, the  
397 H1av variants had clearly undergone positive selection on specific codons located in antigenic sites, which is  
398 known to alter the binding of neutralizing antibodies<sup>48-50</sup>. This further confirm our previous findings, that the  
399 herd immunity leads to significant antigenic drift in the globular head of the HA protein, as seen for human  
400 seasonal IAV<sup>51</sup>. Furthermore, the finding of similar residues undergoing positive selection between different  
401 herds, indicates that some residues in the HA protein are of particular importance for swIAV evolution.  
402 Finally, the substitution rate estimated for H1av was similar to that documented in previous studies<sup>52-55</sup>, but  
403 was lower than the substitution rate estimated for H1av in a single herd over time<sup>37</sup>. This emphasize that one  
404 should differentiate when comparing evolutionary results based on data obtained from a single herd or data  
405 obtained through extensive surveillance programs.

406 The H1pdm09 sequences analyzed in this study, revealed the existence of two groups of sequences. One  
407 group of H1pdm09 sequences forming a well-defined cluster only containing sequences derived from swine  
408 (Sw-L sequences) and another group of more diverse swine derived H1pdm09 sequences (Hu-L sequences)  
409 that were scattered among human seasonal H1pdm09 sequences. In general, relatively long branches  
410 separated the Danish Hu-L H1pdm09 swine sequences and the closest human sequences. However, a few of  
411 the Hu-L sequences from Danish swine had a high level of identity to viruses isolated from humans during  
412 the corresponding human influenza season, indicating a very recent “spill-over” from humans to pigs.  
413 Indeed, all the Danish Hu-L viruses probably represents reverse zoonotic events, where the H1N1pdm09  
414 virus was transmitted from humans to swine, and has started to evolve in pigs and by that has drifted away  
415 from the human “seed” virus. The other group of H1pdmNx viruses found in Danish swine, formed a clearly  
416 defined cluster (Sw-L cluster) that was different from the human seasonal H1N1pdm09 sequences.  
417 Interestingly, this cluster also contained 11 viruses isolated from swine in Germany and one from Italy. This  
418 is not surprising, since Denmark has an annual export of more than 10 million weaned pigs to mainly Eastern  
419 Europe and Germany, which are not tested for swIAV prior to export. In contrast, all swine adapted  
420 H1N1pdm09 viruses (SwD) found in France during recent years<sup>41</sup> formed another unique cluster that were  
421 only distantly related to the “Danish-German” Sw-L cluster, confirming that the evolution of swIAV follows  
422 different evolutionary traits in populations that are not epidemiologically connected.

423 We estimated that the diversion into the Sw-L clusters occurred around 2011, approximately one year after  
424 the first H1N1pdm09 virus was detected in Danish swine. This indicates that the virus needed little time to  
425 become established in pigs, which is supported by the finding that this subtype constituted 21 % of the IAV  
426 positive samples already in 2011. Comparison of the aa sequences between the two Danish H1pdm09  
427 clusters (Sw-L and Hu-L) revealed 20 aa differences and four of these aa positions were shared between the  
428 Danish Sw-L cluster and the French swine divergent cluster (SwD)<sup>41</sup>, indicating that these residues are  
429 important for adaption of this virus to swine. The fact that several of the 20 aa differences were present in the



430 RBS emphasize the probable relation to host-adaption.

431 In summary, the presented data strongly indicate that the human seasonal H1N1pdm09 viruses still are  
432 capable of infecting swine, despite more than ten years of adaption to humans, but it is unclear if the swine  
433 adapted viruses of the Sw-L cluster also have retained its capability to infect humans. Studies to investigate  
434 this in the ferret model are ongoing.

435 In comparison to the H1av sequences, the H1pdm09 sequences exhibited a lower level of sequence diversity,  
436 probably because the H1pdmNx has circulated in Danish swine for significant shorter time than the H1avNx  
437 strains. In contrast, the substitution rate and the positive selection on the RBS and antigenic sites were  
438 comparable to that of the H1av sequences when the evolutionary analysis were performed on the Danish  
439 H1pdm09 Hu-L sequences separately, whereas there was no evidence of positive selection on the H1pdm09  
440 Sw-L sequences. Moreover, the substitution rate and the temporal signal were higher for the Hu-L sequences  
441 compared to the Sw-L sequences. Nevertheless, as described above, 20 aa residues were identified that  
442 differed between all or most of the H1pdm09 sequences of the Sw-L cluster and Hu-L sequences. Thirteen of  
443 these changes were situated in the RBS or antigenic sites, indicating that the two groups of viruses had been  
444 under separate selective pressure. Additionally, the Sw-L H1pdm09 proteins seemed to have gained changes  
445 enhancing O-linked glycosylation in connection to position 150 located in the RBS. The general  
446 epidemiological differences between these two groups of viruses is that the Sw-L group has circulated  
447 among pigs since 2011, whereas the Hu-L group probably represents multiple introductions from humans in  
448 different seasons and by that have had less time to adapt to pigs. Thus, the evolutionary rate calculated for  
449 the Hu-L sequences may actually reflect evolution that happened in humans prior to the jump into pigs. This  
450 notion is supported by no specific swine and human residues being identified when comparing all swine and  
451 human derived H1pdm09 sequences. Another explanation could be that the specific differences observed in  
452 the H1pdm09 protein sequences of the Sw-L group of viruses reflect adaption to swine, which probably  
453 mainly took place during the first passages among pigs, whereafter the sequences mainly experience negative  
454 selection as seen for the Sw-L group of viruses that diverted into a separate clusters around 2011. There is a  
455 lack of published data on the molecular adaptations that take place during these reverse zoonotic events of  
456 influenza A virus and therefore the hypotheses described above remain speculative. From a zoonotic point of  
457 view, it is worrying that the H1N1pdm09 viruses seem to evolve in different directions in pigs and humans,  
458 especially if the swine adapted Sw-L viruses retain their capacity to infect humans. Thirteen of the 20 aa  
459 residues, that differed between the human and swine adapted viruses, were situated in important antigenic  
460 sites or the RBS, and 7/20 aa residues were present in all Sw-L H1pdm09 sequences and were absent in the  
461 Hu-L and human seasonal H1pdm09 sequences. However, antigenic cartography performed on H1N1pdm09  
462 viruses collected in France, showed a high degree of cross-protection between the swine adapted and the  
463 human seasonal-like H1N1pdm09 viruses isolated in 2014-16<sup>41</sup>. Nonetheless, it should be taken into  
464 consideration that the Sw-L cluster of our study showed several changes different from the French swine



465 divergent cluster (SwD) and therefore the antigen cartography should be repeated on the Danish H1pdmNx  
466 viruses of the Sw-L cluster. Overall, the monitoring of the antigenic evolution of H1pdmNx swine adapted  
467 viruses should be prioritized in the future, to ensure early detection of emerging virus with altered  
468 antigenicity. This is highly important, as decreased cross protection between these two clusters would be  
469 detrimental if the swine adapted virus jumps back into humans. Similarly having an IAV monitoring of  
470 personal in affected herds should be considered.

#### 471 *Specific host and virulence markers*

472 In summary, the HA proteins of the H1pdm09 viruses seem to be better adapted to elicit a strong receptor  
473 binding to the  $\alpha$ 2.6-linked sialic acid receptor compared to the H1av HA proteins. This may reflect that the  
474 H1pdm09 HA are descendants of the H1N1 “Spanish flu” strain<sup>18</sup> and by that have circulated in mammals  
475 for at least 100 years, whereas the H1av HA protein was first detected in a mammal (pig) in the eighties<sup>56</sup>.  
476 In turn, these results could also explain why very few cases of zoonotic infection involving H1av have been  
477 registered<sup>57,58</sup>. The fact that more Danish Hu-L sequences had “D” at position 225 support the assumption  
478 that these H1pdmNx viruses are indeed more similar to human seasonal-like H1Npdm09 viruses compared  
479 to the viruses of the Sw-L cluster and also indicate that the G225D transition may be more important in  
480 humans than in swine. The comparison of swine H1pdm09 sequences and human seasonal H1pdm09 aa  
481 sequences revealed that the residue at position 273 might be a potential marker important for distinguishing  
482 between swine and human H1pdm09 sequences. However, this residue was not 100 % unique to one of the  
483 two groups of sequences, and more studies should be performed to identify specific swine and human  
484 markers of the H1pdmNx subtypes. In addition, the eight aa residues defined to differ between avian IAVs  
485 and H1N1pdm09 origin viruses in the NP, PB1, PB2 and PA gene segments<sup>59</sup> were consistent with the  
486 residues observed in the two clusters (avian-like swine and H1N1pdm09) of the NP, PB1, PB2 and PA genes  
487 segments of this study. This suggests that these residues are indeed specific for H1pdmNx swIAV.

488 The recently identified residues 48Q, 98K and 99K of the Eurasian avian-like swIAV NP protein conferring  
489 MxA resistance<sup>60</sup>, was documented in the majority (81%) of the Danish NP protein of avian-like swine  
490 origin. MxA resistance is essential for zoonotic and pandemic potential of avian and swine IAV<sup>60,61</sup>, and  
491 there is therefore a potential increased risk of zoonotic transmission in the Danish herds, where circulation of  
492 swIAV strains carrying these three mutations is present.

493 As for the aa changes observed between the Sw-L and Hu-L sequences in the internal proteins the T76A  
494 change in the PB2 protein has been linked an elevated interferon response<sup>62</sup>. Furthermore, the M283I aa  
495 change in the PB2 protein has previously been linked to decreased virulence of avian H5 IAV<sup>63,64</sup> and the  
496 N456S aa change has, on the other hand, been linked to human adaptations of the H3N2 subtype<sup>65</sup>. For the  
497 PB1 protein, the M317I aa change has been identified in a H2N2 after multiple passaging in chicken eggs to

498 create a temperature sensitive IAV strain<sup>66</sup>. Finally, the C241Y in the PA protein has been linked to  
499 mammalian adaptations of avian H5N1 viruses<sup>67</sup>. In summary, several of the aa changes observed between the  
500 Sw-L and Hu-L internal proteins have previously been described to have an influence on the virulence,  
501 replication efficiency or host-response/adaptation, thereby emphasizing that these changes could be  
502 important in the adaptation of H1pdm09Nx viruses to swine. However, this needs to be investigated further.

### 503 *Importance of swIAV surveillance programs*

504 The results generated in connection with the passive surveillance program of swIAV performed in Denmark  
505 from 2011-2018, highlights the importance of such a program. The surveillance was essential in identifying  
506 novel subtypes and variants that circulate among Danish swine, and the knowledge supports veterinarians  
507 and farmers daily in selecting the most compatible swIAV vaccine and understanding the swIAV  
508 transmission dynamics in the herd. Moreover, novel subtypes not covered by the current available vaccines  
509 were identified, thereby avoiding unnecessary use of vaccines and encouraging medical companies to  
510 prioritize vaccine-updates. These vaccine updates are not only encouraged by identifying novel subtypes, but  
511 also by documenting the level of antigenic drift, which previously has been shown to affect the level of  
512 cross-protection between strains of the same lineage<sup>68</sup>. However, HI-tests, antigenic cartography, virus  
513 neutralization assays and finally controlled animal experiments should be performed on a range of different  
514 strains within each lineage to investigate the consequence of the genetic drift on the cross-protection. The  
515 number of submissions for swIAV diagnostics increased the last years of the surveillance, indicating that the  
516 program is useful for farmers and veterinarians. Moreover, an increase in the number of submissions positive  
517 for swIAV may indicate that swIAV infections represent an increasing problem in Danish swine herds or that  
518 there is increased focus on swIAV as an important pathogen in the herds. Finally, the ability of the program  
519 in identifying novel subtypes and variants that might have an increased zoonotic potential is vital from a  
520 human health perspective, as it can function as an early warning system for future human IAV pandemics.

## 521 **Materials and Methods**

### 522 *Samples*

523 Samples, including lung tissues, nasal swabs and oral fluids, originating from swine herds experiencing  
524 clinical signs of acute respiratory disease, were submitted for routine diagnostic examinations at the Danish  
525 National Veterinary Institute by veterinary practitioners from 2011 until 2018. The submissions included 1 to  
526 5 samples (yearly average: 2-2.9) from each herd.

### 527 *RNA isolation*

528 Total RNA was extracted from lung tissue, nasal swab samples or cell cultured virus isolates by RNeasy  
529 Mini Kit (QIAGEN, Denmark) automated on the QIAcube (QIAGEN) according to the instructions from the  
530 supplier. The samples were prepared for extraction as follows; 200 µl nasal swab sample or virus isolate  
531 were mixed with 400 µl RLT-buffer containing β-mercaptoethanol, whereas 30 mg of lung tissue was  
532 homogenized in 600 µl RLT-buffer containing β-mercaptoethanol for 30 sec at 15 Hz using the TissueLyser  
533 II (Qiagen).

534 Oral fluid samples were prepared by homogenization of 200 µl sample (30 sec at 15 Hz) in a TissueLyser II  
535 (Qiagen) followed by centrifugation (2 min at 10.000 rpm). Total RNA was extracted from 140 µl of the  
536 prepared oral fluid sample using the QIAamp Viral RNA Mini Kit (Qiagen) automated on the QIAcube  
537 (Qiagen) according to the instructions from the supplier.

538 The total RNA from all sample types was eluted in 60µl RNase-free water and stored at -80 °C until further  
539 analysis. Positive and negative controls were included in all extractions.

#### 540 *Detection of swIAV*

541 The presence of swIAV was detected by an in-house modified version of a real time RT-PCR assay detecting  
542 the M gene<sup>69</sup>. The assay was performed in a total reaction volume of 25 µl using the RNA Ultrasense One-  
543 Step Quantitative RT-PCR System (Invitrogen), 3 µl of extracted RNA, 300 nM forward primer (RimF), 600  
544 nM 5'-labeled reverse primer (MaR-FAM), 400 nM 3'-labeled probe (MaProbe). Details of the primers and  
545 probes are listed in Table 1. All reactions were analyzed on the Rotor-GeneQ machine (Qiagen) using the  
546 following PCR conditions: [50 °C 30 min; 95 °C 2 min; 45 cycles of 95 °C 15 sec, 55 °C 15 sec (acquiring  
547 using 470 nm as source and 660 nm as detector), 72 °C 20 sec; 95 °C 15 sec; Melt curve analysis by ramping  
548 from 50 °C to 99 °C, wait for 90 sec on pre-melt conditioning at first step, rising by 1 °C each step and wait  
549 for 5 sec before acquiring]. A positive and negative control were included in all runs.

#### 550 *Test for the HA gene of H1N1pdm09 origin by specific real time PCR*

551 All swIAV positive samples were tested for the presence of the HA gene of H1N1pdm09 origin (H1pdm09)  
552 by an in-house real time RT-PCR assay detecting specifically the HA gene of the pandemic virus (Table 1).  
553 All reactions were analyzed in a Rotor-GeneQ machine (Qiagen) using the following PCR conditions: [45 °C  
554 for 10 min; 95 °C for 10 min; 45 cycles of 95 °C for 15sec; 55 °C for 20 sec; 72 °C for 30 sec]. In 2018, an  
555 additional assay targeting the H1pdm09 was implemented to increase the sensitivity of the H1pdm09  
556 screening (Table 1). The two H1pdm09 assays were run as a multiplex on the Rotor-GeneQ machine  
557 (Qiagen) using the following PCR conditions: [45 °C, 20 min; 95 °C, 15 min; 45 cycles: 94 °C, 30 sec; 55  
558 °C, 20 sec; 60 °C, 20 sec]. A positive and negative control were included in all runs.

559 *Subtyping*

560 From 2011-2014, the swIAV positive samples were subtyped using Sanger sequencing of the HA and NA  
561 genes according to a previously described PCR protocol<sup>70</sup>. The PCR products were purified using the High  
562 Pure PCR product Purification Kit (Roche, Denmark). Subsequently the purified PCR products were sent for  
563 sequencing at LGC Genomics (Berlin, Germany) with primers comprised of the “pQE” part of the PCR  
564 primers (Table 1).

565 From 2015-2017, samples were subtyped using a multiplex real time RT-PCR assay strategy. Two multiplex  
566 reactions including primers and probes for H3hu, N1pdm, H1av, N2hu or H3sw, H1pdm, N1sw, N2sw+hu,  
567 respectively<sup>34</sup> (Table 1) were analyzed on the Rotor-GeneQ machine (Qiagen) using the following PCR  
568 conditions: 50 °C for 20 min; 95 °C for 15 min; 40 cycles of 94 °C for 60 sec, 60 °C for 90 sec. In 2018,  
569 subtyping of swIAV positive samples were in addition performed on the Fluidigm PCR platform (AH  
570 diagnostics, United States) according to a previously published protocol<sup>71</sup>. All runs on the Rotor-GeneQ and  
571 the Fluidigm included positive controls representing all the possible subtypes targeted by the different assays  
572 along with a negative control.

573 *Virus isolation*

574 Virus was isolated from selected swIAV positive clinical specimens by inoculation of Madin Darby Canine  
575 Kidney (MDCK) cells following standard cell culture procedures. In short, 150 mg lung tissue was  
576 homogenized in 1.5 ml MEM (Invitrogen Carlsbad, CA, USA) containing 1000 units/ml Penicillin and 1  
577 mg/ml Streptomycin. Sterile filtrated inoculums were prepared in viral growth medium (MEM 1x, L-  
578 Glutamin 2 mM, Non-essential amino acids 1x, 100 units/ml Penicillin, 100 µg/ml Streptomycin and TPKK-  
579 treated trypsin 2 µg/ml) using either 10 % lung tissue homogenate or 20 % nasal swab or oral fluid sample.  
580 The inoculum was added to 70 % confluent MDCK cells for 45 minutes at 37 °C and 5 % CO<sub>2</sub> followed by  
581 the addition of fresh viral growth medium after wash of the inoculated cells. After 3 days, the cell culture  
582 supernatant was harvested and tested for influenza A virus by real time RT-PCR.

583 *Full genome sequencing*

584 From 2013-2017 full genome sequencing was performed on cell culture-propagated influenza virus samples,  
585 which had been subjected to full-length PCR amplification of all eight gene segments with in-house designed  
586 primers (Table 1) using SuperScript III OneStep RT-PCR System with Platinum Taq High Fidelity. The PCR  
587 conditions were as follow for each gene segment: HA: 55°C, 30 min, 94 °C, 2 min, 4x (94 °C, 30 sec – 55  
588 °C, 30 sec - 68 °C, 180 sec), 41x (94 °C, 30 sec – 68 °C, 210 sec) and 68°C, 10 min. NA: 54 °C, 30 min, 94  
589 °C, 2 min, 4x (94 °C, 30 sec – 58 °C, 30 sec - 68 °C, 180 sec), 41x (94 °C, 30 sec – 68 °C, 210 sec) and  
590 68°C, 10 min. M: 50°C, 30 min, 94 °C, 2 min, 41x (94 °C, 30 sec – 56°C, 30 sec - 68°C, 90 sec) and 68°C,

591 10 min. Nucleoprotein (NP): 58 °C, 30 min, 94 °C, 2 min, 4x (94 °C, 30 sec – 54 °C, 30 sec - 68 °C, 180 sec)  
592 and 41x (94 °C, 30 sec – 68 °C, 210 sec) and 68°C, 10 min. Nonstructural protein (NS): 58°C, 30 min, 94  
593 °C, 2 min, 41x (94 °C, 30 sec – 55°C, 30 sec, 68°C, 90 sec) and 68°C, 10 min. Polymerase basic protein 1  
594 (PB1) and polymerase acidic protein (PA): 52 °C, 30 min, 94 °C, 2 min, 4x (94 °C, 30 sec – 52 °C, 30 sec -  
595 68 °C, 180 sec), 41x (94 °C, 30 sec – 68 °C, 210 sec) and 68°C, 10 min. Polymerase basic protein 2 (PB2):  
596 55 °C, 30 min, 94 °C, 2 min, 4x (94 °C, 30 sec – 52 °C, 30 sec - 68 °C, 180 sec), 41x (94 °C, 30 sec – 68 °C,  
597 210 sec) and 68°C, 10 min. Purified PCR products for all gene segments were pooled in equimolar quantity  
598 to a final amount of 1 µg and used for next generation sequencing (NGS) on the Ion Torrent PGM™  
599 sequencer. The NGS, including library preparation, was carried out at the Multi-Assay Core facility located  
600 at the Technical University of Denmark. In 2018, full genome sequencing were performed on cell culture  
601 propagated virus samples using universal influenza primers<sup>72</sup> (Table 1). Library preparation and NGS on the  
602 Illumina MiSeq platform were conducted at the Statens Serum Institut, Denmark.

### 603 *Sequence analysis*

604 Data obtained from Sanger sequencing and subsequent analyses of the consensus sequences were performed  
605 using CLC Main Workbench version 7.6.2-20.0.3 (CLC bio A/S, Aarhus, Denmark). Alignments of each  
606 gene segment were created using the MUSCLE algorithm<sup>73</sup>. Phylogenetic trees were constructed using a  
607 distance-based method with the Neighbor Joining algorithm and bootstrap analysis with 1000 replicates. The  
608 results were verified by using Maximum Likelihood Phylogeny. Sequences obtained by NGS were  
609 assembled using the features “de novo assembly” and “map read to references” using 22 reference sequences  
610 representing the different lineages of each gene segment in CLC Genomics Workbench 4.6.1-8.0.2 (CLC bio  
611 A/S). The subtype and lineage of each sample and gene segment were determined based on MUSCLE  
612 alignments, subsequent neighbor joining phylogenetic trees, and the function “BLAST against NCBI”.  
613 Moreover, sequence alignments of each lineage of the two surface gene segments (H1pdm09, H1av, N1pdm,  
614 N1av, N2hu and N2sw) were analyzed for the average nucleotide diversity ( $\pi$ ) using author’s own software.  
615 For more detailed phylogenetic analysis, Bayesian trees of each gene segment (internal genes) and lineage  
616 (H1pdm09, H1av, N1pdm, N1av, N2hu and N2sw) were constructed using the program MrBayes with the  
617 following settings; nst=mixed and rates=invgamma. The trees were run for 10.000.000 generations and a  
618 sample frequency of 500<sup>74</sup>. An additional alignment and Bayesian tree was constructed for the H1pdm09  
619 gene, including all available European swine H1N1pdm09 sequences from NCBI GenBank and GISAID and  
620 all Danish human H1N1pdm09 sequences available for the years 2009-2018 in GISAID together with a  
621 selection of human H1N1pdm09 sequences from other countries. For visualization, the number of sequences  
622 were subsequently reduced excluding sequences with 100 % nucleotide sequence identity. A list of all the  
623 reference sequences used can be found in Supplementary table 1. Convergence of the Bayesian analysis was  
624 checked using Tracer version 1.7.1<sup>75</sup>, and the results visualized in Figtree version 1.4.4<sup>76</sup>.

625 In addition to the Bayesian phylogenetic analyses, strict molecular clock trees were constructed for the  
626 surface gene segments of the lineages; H1pdm09, H1av, N1pdm, N1av, N2hu and N2sw to determine the  
627 temporal evolution and the substitution rate. However, before the trees were constructed, all sequences were  
628 investigated for the presence of a temporal signal (i.e., whether nucleotide changes accumulate roughly  
629 proportionally to elapsed time) using the program TempEst<sup>77</sup> and evaluating the correlation coefficient.  
630 Subsequently, the alignments of each lineage were analyzed in the program BEAST2 version 2.5.2, where  
631 the model settings were as previously described<sup>68</sup>. Briefly, the HKY substitution model with gamma-  
632 distributed rates over sites was chosen along with a strict clock model including tip dates. The outcome of  
633 the analysis was visualized in Figtree version 1.4.4<sup>76</sup> and convergence checked in Tracer version 1.7.1<sup>75</sup>.

634 The surface gene segments of the different lineages; H1pdm09, H1av, N1pdm, N1av, N2hu and N2sw were  
635 investigated for the presence of positive selection using the CODEML program of the PAML package as  
636 previously described<sup>48</sup>. Briefly, this was done by comparing the fits of CODEML's substitution models M1a  
637 and M2a (NSsites = 1 and 2). M1a includes two categories of codons – some under negative selection  
638 (dN/dS ratio < 1) and some codons where mutations are neutral (dN/dS ratio = 1). Model M2a includes three  
639 categories of codons – the same two as M1a plus an additional category of codons under positive selection  
640 (dN/dS ratio > 1). If M2a fits a dataset significantly better than M1a, then there is evidence of positive  
641 selection in some codons (and the identity of these codons is also determined during model fitting). The  
642 average dN/dS ratio (global  $\omega$  ratio) of the surface gene segments of the different lineages; H1pdm09, H1av,  
643 N1pdm, N1av, N2hu and N2sw were also estimated using CODEML with the setting NSsites = 0.

644 All nucleotide sequences of each gene segment were translated into amino acid (aa), and MUSCLE<sup>73</sup>  
645 alignments were created using CLC Main Workbench 20.0.3 (CLC bio A/S, Aarhus, Denmark).  
646 Subsequently, the alignments were manually examined to determine the presence of previously described aa  
647 differences and residues. Specifically, for the HA proteins these included residues unique to the  
648 H1pdmN2sw subtype<sup>27</sup> and residues linked to receptor binding<sup>78,79</sup>. Moreover, the five previously defined  
649 antigenic sites Sa, Sb, Ca1, Ca2 and Cb of the H1 subtype<sup>49,80,81</sup> and the receptor-binding site (RBS)<sup>82</sup> were  
650 annotated to the H1av and H1pdm09 proteins and investigated for divergence and correlations to codons  
651 with increased dN/dS ratios. For the NA protein residues encoding neuraminidase inhibitor resistance were  
652 investigated<sup>83</sup>. All PB2 proteins were examined for specific residues encoding virulence<sup>84</sup>, pathogenicity<sup>85</sup>  
653 and host adaptation<sup>86</sup>. The eight residues of the NP, PB1, PB2 and PA proteins proposed to differ between  
654 avian viruses and viruses of the H1N1pdm09 subtype<sup>59</sup>, were also investigated. Finally the three residues of  
655 the NP protein recently found to confer MxA resistance<sup>60</sup> were examined. The two groups of the H1pdm09  
656 proteins were examined for differences in the number and location of N-linked and O-linked glycosylation  
657 sites using the NetNGlyc 1.0<sup>87</sup> and NetOGlyc 4.0<sup>88</sup> servers from DTU Bioinformatics, Denmark.

658 *Statistics*



659 Results of the screening for swIAV and H1pdm09 in each submission were analyzed in Microsoft Excel  
660 2016 version 16.0.4993.1001 and GraphPad<sup>89</sup>. The proportions of swIAV positive, swIAV negative and the  
661 proportion of H1pdm09 positive submissions compared to total number of swIAV positive submissions were  
662 calculated for each month. The monthly average percentage of swIAV positive submissions and the  
663 proportion of H1pdm09 positive submissions were calculated based on the results obtained from each month  
664 during the eight years, and the differences in the pairwise percentages and proportions of swIAV and  
665 H1pdm09 submission were investigated using a student's t-test and a Fisher's exact test in GraphPad<sup>89</sup>. To  
666 determine differences between the prevalence of a specific aa residue at a given position a chi-squared test  
667 in GraphPad<sup>89</sup> was utilized. P-values below 0.05 were considered statistically significant.

### 668 **Acknowledgements**

669 The authors would like to acknowledge all the Danish herds that submitted samples for the surveillance.  
670 Moreover, we acknowledge the authors, originating and submitting laboratories of the sequences that we  
671 obtained from GISAID's EpiFlu™ Database ([www.gisaid.org](http://www.gisaid.org)) and NCBI GenBank  
672 ([www.ncbi.nlm.nih.gov](http://www.ncbi.nlm.nih.gov)).

### 673 **Competing interests**

674 The authors declare no conflict of interest.

### 675 **Funding**

676 The farmers or the medical company IDT Biologika GmbH paid the initial screening for the presence of  
677 swIAV in a submission, while the Danish Veterinary and Food Administration paid the remaining analyses.  
678 In addition, the work presented in this article was supported by Novo Nordisk Foundation (FluZooMark –  
679 grant # NNF19OC0056326)

### 680 **References**

- 681 1. Opriessnig, T., Giménez-Lirola, L. G. & Halbur, P. G. Polymicrobial respiratory disease in pigs.  
682 *Anim. Heal. Res. Rev.* **12**, 133–148 (2011).
- 683 2. Brown, I. *et al.* Pathogenicity of a swine influenza H1N1 virus antigenically distinguishable from  
684 classical and European strains. *Vet. Rec.* **132**, 598–602 (1993).
- 685 3. Jung, K., Ha, Y. & Chae, C. Pathogenesis of Swine Influenza Virus Subtype H1N2 Infection in Pigs.  
686 *J. Comp. Pathol.* **132**, 179–184 (2005).
- 687 4. Vincent, A. *et al.* Review of Influenza A Virus in Swine Worldwide: A Call for Increased  
688 Surveillance and Research. *Zoonoses Public Health* **61**, 4–17 (2014).



- 689 5. Medina, R. A. & García-Sastre, A. Influenza A viruses: new research developments. *Nat. Rev.*  
690 *Microbiol.* **9**, 590–603 (2011).
- 691 6. Vincent, A. *et al.* Review of Influenza A Virus in Swine Worldwide: A Call for Increased  
692 Surveillance and Research. *Zoonoses Public Health* **61**, 4–17 (2014).
- 693 7. Anderson, T. K. *et al.* A Phylogeny-Based Global Nomenclature System and Automated Annotation  
694 Tool for H1 Hemagglutinin Genes from Swine Influenza A Viruses. *mSphere* **1**, (2016).
- 695 8. Pensaert, M., Ottis, K., Vandeputte, J., Kaplan, M. M. & Bachmann, P. A. Evidence for the natural  
696 transmission of influenza A virus from wild ducks to swine and its potential importance for man.  
697 *Bull. World Health Organ.* **59**, 75–78 (1981).
- 698 9. Castrucci, M. R. *et al.* Genetic reassortment between avian and human influenza A viruses in Italian  
699 pigs. *Virology* **193**, 503–506 (1993).
- 700 10. Haesebrouck, F., Biront, P., Pensaert, M. B. & Leunen, J. Epizootics of respiratory tract disease in  
701 swine in Belgium due to H3N2 influenza virus and experimental reproduction of disease. *Am. J. Vet.*  
702 *Res.* **46**, 1926—1928 (1985).
- 703 11. Alexander, D. J., Brown, I. H., Harris, P. A. & McCauley, J. W. Multiple genetic reassortment of  
704 avian and human influenza A viruses in European pigs, resulting in the emergence of an H1N2 virus  
705 of novel genotype. *J. Gen. Virol.* **79**, 2947–2955 (1998).
- 706 12. Trebbien, R. *et al.* Genetic and biological characterisation of an avian-like H1N2 swine influenza  
707 virus generated by reassortment of circulating avian-like H1N1 and H3N2 subtypes in Denmark.  
708 *Virol. J.* **10**, 290 (2013).
- 709 13. Bálint, Á. *et al.* The first Swedish H1N2 swine influenza virus isolate represents an uncommon  
710 reassortant. *Virol. J.* **6**, 180 (2009).
- 711 14. Moreno, A. *et al.* Genomic characterization of H1N2 swine influenza viruses in Italy. *Vet. Microbiol.*  
712 **156**, 265–276 (2012).
- 713 15. Watson, S. J. *et al.* Molecular Epidemiology and Evolution of Influenza Viruses Circulating within  
714 European Swine between 2009 and 2013. *J. Virol.* **89**, 9920–9931 (2015).
- 715 16. Simon, G. *et al.* European Surveillance Network for Influenza in Pigs: Surveillance Programs,  
716 Diagnostic Tools and Swine Influenza Virus Subtypes Identified in 14 European Countries from 2010  
717 to 2013. *PLoS One* **9**, e115815 (2014).
- 718 17. Garten, R. J. *et al.* Antigenic and genetic characteristics of swine-origin 2009 A(H1N1) influenza  
719 viruses circulating in humans. *Science* **325**, 197–201 (2009).

- 720 18. Smith, G. J. D. *et al.* Origins and evolutionary genomics of the 2009 swine-origin H1N1 influenza A  
721 epidemic. *Nature* **459**, 1122–5 (2009).
- 722 19. Mena, I. *et al.* Origins of the 2009 H1N1 influenza pandemic in swine in Mexico. *Elife* **5**, (2016).
- 723 20. Forgie, S. E. *et al.* Swine outbreak of pandemic influenza A virus on a canadian research farm  
724 supports human-to-swine transmission. *Clin. Infect. Dis.* **52**, 10–18 (2011).
- 725 21. Welsh, M. D. *et al.* Initial incursion of pandemic (H1N1) 2009 influenza A virus into European pigs.  
726 *Vet. Rec.* **166**, 642–645 (2010).
- 727 22. Matsuu, A. *et al.* Genetic characterization of swine influenza viruses isolated in Japan between 2009  
728 and 2012. *Microbiol. Immunol.* **56**, 792–803 (2012).
- 729 23. Brookes, S. M. *et al.* Replication, pathogenesis and transmission of pandemic (H1N1) 2009 virus in  
730 non-immune pigs. *PLoS One* **5**, (2010).
- 731 24. Howard, W. A. *et al.* Reassortant pandemic (H1N1) 2009 virus in pigs, United Kingdom. *Emerg.*  
732 *Infect. Dis.* **17**, 1049–1052 (2011).
- 733 25. Vijaykrishna, D. *et al.* Reassortment of pandemic H1N1/2009 influenza A virus in swine. *Science*  
734 **328**, 1529 (2010).
- 735 26. Krog, J. S., Hjulsager, C. K., Larsen, M. A. & Larsen, L. E. Triple-reassortant influenza A virus with  
736 H3 of human seasonal origin, NA of swine origin, and internal A(H1N1) pandemic 2009 genes is  
737 established in Danish pigs. *Influenza Other Respi. Viruses* **11**, 298–303 (2017).
- 738 27. Starick, E. *et al.* Reassortants of pandemic influenza A virus H1N1/2009 and endemic porcine HxN2  
739 viruses emerge in swine populations in Germany. *J. Gen. Virol.* **93**, 1658–1663 (2012).
- 740 28. Christiansen, M. G. *Strukturudvikling i dansk griseproduktion 2019*.  
741 <https://svineproduktion.dk/publikationer/kilder/notater/2019/1915> (2019).
- 742 29. Breum, S. Ø., Hjulsager, C. K., Trebbien, R. & Larsen, L. E. Influenza a virus with a human-like n2  
743 gene is circulating in pigs. *Genome Announc.* **1**, e00712-13 (2013).
- 744 30. Diaz, A. *et al.* Association between Influenza A Virus Infection and Pigs Subpopulations in  
745 Endemically Infected Breeding Herds. *PLoS One* **10**, e0129213 (2015).
- 746 31. Walia, R. R., Anderson, T. K. & Vincent, A. L. Regional patterns of genetic diversity in swine  
747 influenza A viruses in the United States from 2010 to 2016. *Influenza Other Respi. Viruses* **13**, 262–  
748 273 (2019).
- 749 32. Chamba Pardo, F. O. *et al.* Influenza Herd-Level Prevalence and Seasonality in Breed-to-Wean Pig

- 750 Farms in the Midwestern United States. *Front. Vet. Sci.* **4**, (2017).
- 751 33. Kyriakis, C. S. *et al.* Virological Surveillance and Preliminary Antigenic Characterization of  
752 Influenza Viruses in Pigs in Five European Countries from 2006 to 2008. *Zoonoses Public Health* **58**,  
753 93–101 (2011).
- 754 34. Ryt-Hansen, P. *et al.* Longitudinal field studies reveal early infection and persistence of influenza A  
755 virus in piglets despite the presence of maternally derived antibodies. *Vet. Res.* **50**, 36 (2019).
- 756 35. Simon-Grifé, M. *et al.* Swine influenza virus infection dynamics in two pig farms; results of a  
757 longitudinal assessment. *Vet. Res.* **43**, 24 (2012).
- 758 36. Rose, N. *et al.* Dynamics of influenza A virus infections in permanently infected pig farms: evidence  
759 of recurrent infections, circulation of several swine influenza viruses and reassortment events. *Vet.*  
760 *Res.* **44**, 72 (2013).
- 761 37. Ryt-Hansen, P. *et al.* Substantial antigenic drift in the hemagglutinin protein of swine influenza a  
762 viruses. *Viruses* (2020) doi:10.3390/v12020248.
- 763 38. Harder, T. C. *et al.* Expanded Cocirculation of Stable Subtypes, Emerging Lineages, and New  
764 Sporadic Reassortants of Porcine Influenza Viruses in Swine Populations in Northwest Germany. *J.*  
765 *Virol.* **87**, 10460–10476 (2013).
- 766 39. Hervé, S. *et al.* Virological and epidemiological patterns of swine influenza A virus infections in  
767 France: Cumulative data from the RESAVIP surveillance network, 2011–2018. *Vet. Microbiol.*  
768 (2019) doi:10.1016/j.vetmic.2019.108477.
- 769 40. Eze, J. I. *et al.* Comparison of respiratory disease prevalence among voluntary monitoring systems for  
770 pig health and welfare in the UK. *PLoS One* (2015) doi:10.1371/journal.pone.0128137.
- 771 41. Chastagner, A. *et al.* Spatiotemporal Distribution and Evolution of the A/H1N1 2009 Pandemic  
772 Influenza Virus in Pigs in France from 2009 to 2017: Identification of a Potential Swine-Specific  
773 Lineage. *J. Virol.* **92**, (2018).
- 774 42. Ma, J. *et al.* Pathogenicity and Transmissibility of Novel Reassortant H3N2 Influenza Viruses with  
775 2009 Pandemic H1N1 Genes in Pigs. *J. Virol.* (2015) doi:10.1128/jvi.03355-14.
- 776 43. Chou, Y. -y. *et al.* The M Segment of the 2009 New Pandemic H1N1 Influenza Virus Is Critical for  
777 Its High Transmission Efficiency in the Guinea Pig Model. *J. Virol.* (2011) doi:10.1128/jvi.05794-11.
- 778 44. Bowman, A. S. *et al.* Molecular evidence for interspecies transmission of H3N2pM/H3N2v influenza  
779 A viruses at an Ohio agricultural fair, July 2012. *Emerg. Microbes Infect.* (2012)  
780 doi:10.1038/emi.2012.33.

- 781 45. Everett, H. E. *et al.* Interspecies transmission of reassortant swine influenza a virus containing genes  
782 from swine influenza A(H1N1)pdm09 and A(H1N2) viruses. *Emerg. Infect. Dis.* (2020)  
783 doi:10.3201/eid2602.190486.
- 784 46. Kim, H., Webster, R. G. & Webby, R. J. Influenza Virus: Dealing with a Drifting and Shifting  
785 Pathogen. *Viral Immunol.* **31**, 174–183 (2018).
- 786 47. Carrat, F. & Flahault, A. Influenza vaccine: The challenge of antigenic drift. *Vaccine* **25**, 6852–6862  
787 (2007).
- 788 48. Ryt-Hansen, P. *et al.* Acute Influenza A virus outbreak in an enzootic infected sow herd: Impact on  
789 viral dynamics, genetic and antigenic variability and effect of maternally derived antibodies and  
790 vaccination. *PLoS One* **14**, e0224854 (2019).
- 791 49. Matsuzaki, Y. *et al.* Epitope Mapping of the Hemagglutinin Molecule of A/(H1N1)pdm09 Influenza  
792 Virus by Using Monoclonal Antibody Escape Mutants. *J. Virol.* **88**, 12364–12373 (2014).
- 793 50. Rudneva, I. *et al.* Escape mutants of pandemic influenza A/H1N1 2009 virus: Variations in antigenic  
794 specificity and receptor affinity of the hemagglutinin. *Virus Res.* **166**, 61–67 (2012).
- 795 51. Petrova, V. N. & Russell, C. A. The evolution of seasonal influenza viruses. *Nat. Rev. Microbiol.* **16**,  
796 47–60 (2018).
- 797 52. Furuse, Y. *et al.* Comparison of selection pressures on the HA gene of pandemic (2009) and seasonal  
798 human and swine influenza A H1 subtype viruses. *Virology* **405**, 314–321 (2010).
- 799 53. Moreno, A. *et al.* Different evolutionary trends of swine H1N2 influenza viruses in Italy compared to  
800 European viruses. *Vet. Res.* **44**, 112 (2013).
- 801 54. Aymard, M. *et al.* Antigenic and genetic diversity among swine influenza A H1N1 and H1N2 viruses  
802 in Europe. *J. Gen. Virol.* **83**, 735–745 (2002).
- 803 55. Lam, T.-Y. *et al.* Evolutionary analyses of European H1N2 swine influenza A virus by placing  
804 timestamps on the multiple reassortment events. *Virus Res.* **131**, 271–278 (2008).
- 805 56. Scholtissek, C., Bürger, H., Bachmann, P. A. & Hannoun, C. Genetic relatedness of hemagglutinins  
806 of the H1 subtype of influenza a viruses isolated from swine and birds. *Virology* **129**, 521–523  
807 (1983).
- 808 57. Jong, J. C. d. *et al.* Isolation of swine-like influenza A(H1N1) viruses from man in Switzerland and  
809 The Netherlands. *Ann. l'Institut Pasteur Virol.* (1988) doi:10.1016/S0769-2617(88)80078-9.
- 810 58. Myers, K. P., Olsen, C. W. & Gray, G. C. Cases of Swine Influenza in Humans: A Review of the

- 811 Literature. *Clin. Infect. Dis.* **44**, 1084–1088 (2007).
- 812 59. Chen, G. W. & Shih, S. R. Genomic signatures of influenza A pandemic (H1N1) 2009 virus. *Emerg.*  
813 *Infect. Dis.* (2009) doi:10.3201/eid1512.090845.
- 814 60. Dornfeld, D., Petric, P. P., Hassan, E., Zell, R. & Schwemmler, M. Eurasian Avian-Like Swine  
815 Influenza A Viruses Escape Human MxA Restriction through Distinct Mutations in Their  
816 Nucleoprotein. *J. Virol.* (2018) doi:10.1128/jvi.00997-18.
- 817 61. Mänz, B. *et al.* Pandemic Influenza A Viruses Escape from Restriction by Human MxA through  
818 Adaptive Mutations in the Nucleoprotein. *PLoS Pathog.* (2013) doi:10.1371/journal.ppat.1003279.
- 819 62. Du, Y. *et al.* Genome-wide identification of interferon-sensitive mutations enables influenza vaccine  
820 design. *Science* (80-. ). (2018) doi:10.1126/science.aan8806.
- 821 63. Chen, Sujuan; Xie, Yizhang; SU, X. L. X. Substitutions in the PB2 methionine 283 residue affect H5  
822 subtype avian influenza virulence. *Transbound. Emerg. Dis.* **Preprint**, (2020).
- 823 64. Wang, X. *et al.* Synergistic effect of PB2 283M and 526R contributes to enhanced virulence of H5N8  
824 influenza viruses in mice. *Vet. Res.* (2017) doi:10.1186/s13567-017-0471-0.
- 825 65. Wen, L. *et al.* Large-scale sequence analysis reveals novel human-adaptive markers in PB2 segment  
826 of seasonal influenza A viruses. *Emerg. Microbes Infect.* (2018) doi:10.1038/s41426-018-0050-0.
- 827 66. Martínez-Sobrido, L., Peersen, O. & Nogales, A. Temperature sensitive mutations in influenza a viral  
828 ribonucleoprotein complex responsible for the attenuation of the live attenuated influenza vaccine.  
829 *Viruses* (2018) doi:10.3390/v10100560.
- 830 67. Yamaji, R. *et al.* Mammalian Adaptive Mutations of the PA Protein of Highly Pathogenic Avian  
831 H5N1 Influenza Virus. *J. Virol.* (2015) doi:10.1128/jvi.03532-14.
- 832 68. Ryt-Hansen, P. *et al.* Acute Influenza A virus outbreak in an enzootic infected sow herd: Impact on  
833 viral dynamics, genetic and antigenic variability and effect of maternally derived antibodies and  
834 vaccination. *PLoS One* (2019) doi:10.1371/journal.pone.0224854.
- 835 69. De Vleeschauwer, A. *et al.* Comparative Pathogenesis of an Avian H5N2 and a Swine H1N1  
836 Influenza Virus in Pigs. *PLoS One* **4**, e6662 (2009).
- 837 70. Ryt-Hansen, P., Larsen, I., Kristensen, C. S., Krog, J. S. & Larsen, L. E. Limited impact of influenza  
838 A virus vaccination of piglets in an enzootic infected sow herd. *Res. Vet. Sci.* (2019).
- 839 71. Goecke, N. B. *et al.* Subtyping of Swine Influenza Viruses Using a High-Throughput Real-Time PCR  
840 Platform. *Front. Cell. Infect. Microbiol.* **8**, (2018).

- 841 72. Kai Lee, H. Simplified Large-Scale Sanger Genome Sequencing for Influenza A/H3N2 Virus. (2016)  
842 doi:10.1.1.797.7928.
- 843 73. C. Edgar, R. MUSCLE: multiple sequence alignment with high accuracy and high throughput. (2013)  
844 doi:10.1.1.318.6508.
- 845 74. Ronquist, F. & Huelsenbeck, J. P. MrBayes 3: Bayesian phylogenetic inference under mixed models.  
846 *Bioinformatics* **19**, 1572–1574 (2003).
- 847 75. Rambaut, A., Drummond, A. J., Xie, D., Baele, G. & Suchard, M. A. Posterior Summarization in  
848 Bayesian Phylogenetics Using Tracer 1.7. *Syst. Biol.* **67**, 901–904 (2018).
- 849 76. Rambaut, A. FigTree. <http://tree.bio.ed.ac.uk/software/figtree/> (2006).
- 850 77. Rambaut, A., Lam, T. T., Max Carvalho, L. & Pybus, O. G. Exploring the temporal structure of  
851 heterochronous sequences using TempEst (formerly Path-O-Gen). *Virus Evol.* **2**, vew007 (2016).
- 852 78. Matrosovich, M. *et al.* Early Alterations of the Receptor-Binding Properties of H1, H2, and H3 Avian  
853 Influenza Virus Hemagglutinins after Their Introduction into Mammals. *J. Virol.* (2000)  
854 doi:10.1128/jvi.74.18.8502-8512.2000.
- 855 79. De Vries, R. P. *et al.* Only two residues are responsible for the dramatic difference in receptor  
856 binding between swine and new pandemic H1 hemagglutinin. *J. Biol. Chem.* (2011)  
857 doi:10.1074/jbc.M110.193557.
- 858 80. Caton, A. J., Brownlee, G. G., Yewdell, J. W. & Gerhard, W. The antigenic structure of the influenza  
859 virus A/PR/8/34 hemagglutinin (H1 subtype). *Cell* **31**, 417–427 (1982).
- 860 81. Manicassamy, B. *et al.* Protection of Mice against Lethal Challenge with 2009 H1N1 Influenza A  
861 Virus by 1918-Like and Classical Swine H1N1 Based Vaccines. *PLoS Pathog.* **6**, e1000745 (2010).
- 862 82. Sriwilaijaroen, N. & Suzuki, Y. Molecular basis of the structure and function of H1 hemagglutinin of  
863 influenza virus. *Proc. Japan Acad. Ser. B* **88**, 226–249 (2012).
- 864 83. Abed, Y., Baz, M. & Boivin, G. Impact of neuraminidase mutations conferring influenza resistance to  
865 neuraminidase inhibitors in the N1 and N2 genetic backgrounds. *Antivir. Ther.* (2006).
- 866 84. Massin, P., van der Werf, S. & Naffakh, N. Residue 627 of PB2 Is a Determinant of Cold Sensitivity  
867 in RNA Replication of Avian Influenza Viruses. *J. Virol.* (2001) doi:10.1128/jvi.75.11.5398-  
868 5404.2001.
- 869 85. Liu, S. *et al.* Substitution of D701N in the PB2 protein could enhance the viral replication and  
870 pathogenicity of Eurasian avian-like H1N1 swine influenza viruses article. *Emerg. Microbes Infect.*



- 871 (2018) doi:10.1038/s41426-018-0073-6.
- 872 86. Taft, A. S. *et al.* Identification of mammalian-adapting mutations in the polymerase complex of an  
873 avian H5N1 influenza virus. *Nat. Commun.* (2015) doi:10.1038/ncomms8491.
- 874 87. Bioinformatics, D. NetNGlyc 1.0 Server. <http://www.cbs.dtu.dk/services/NetNGlyc/> (2017).
- 875 88. Bioinformatics, D. NetOGlyc 4.0 Server. <http://www.cbs.dtu.dk/services/NetOGlyc/> (2017).
- 876 89. GraphPad software. <https://www.graphpad.com/quickcalcs/>.

## 877 Tables

878 **Table 1.** Primers and probes used for detection, subtyping and full genome sequencing of swIAV

|              | Primer/probe | Sequence (5' – 3')                                | Ref.                                              |          |          |
|--------------|--------------|---------------------------------------------------|---------------------------------------------------|----------|----------|
| Detection    | M            | Rim-F                                             | CTTCTAACCGAGGTCGAAACG                             | 69       |          |
|              |              | Rim-R                                             | FAM-AGGGCATTGTTGGACAAKCGTCTA                      |          |          |
|              |              | MaProbe                                           | CCCAGTGAGCGAGGACTGCAGCGT                          |          |          |
| A(H1N1)pdm09 | H1pdm(sw)    | H1fw2sw-3                                         | GAAGTTCAAGCCGAAATAGCA                             | In house |          |
|              |              | H1rev2sw-2                                        | CCC GGC TCT ACT AGT GTC CA                        |          |          |
|              |              | H1probe2sw-3                                      | AT488-CCC AAA GTG AGG RAT CAA GAA GGG AG-BHQ1     |          |          |
| H1pdm(hu)    | H1pdm_Fw     | CTAGTGGTACCGAGATATGCA                             |                                                   | In house |          |
|              |              | H1pdm_Rv                                          | TATTGCAATCGTGGACTGGTGT                            |          |          |
|              |              | H1pdm_P                                           | FAM-CGCAATGGAAAAGAAATGCTGGATCTGG-BHQ1             |          |          |
| Subtyping    | H1av         | H1-av-F                                           | GAA GGR GGA TGG ACA GGA ATG A                     | In house |          |
|              |              | H1-av-R                                           | CAA TTA HTG ART TCA CTT TGT TGC TG                |          |          |
|              |              | H1-av-P                                           | ROX-TCT GGT TAC GCA GCW GAT CAG AAA AGC AC- BHQ2  |          |          |
|              | H3sw         | H3-sw-F                                           | TGA TGG AGC AAA TTG CAC ACT G                     |          | In house |
|              |              | H3-sw-R                                           | CGT TCA ATG AAA AGG TCC CAT TTC                   |          |          |
|              |              | H3-sw-P                                           | AT680-CAC AAT GAG GGT CCC CTA ATA GAG CGT CCA-BBQ |          |          |
|              | H3hu         | H3-hu-F                                           | GATGA TGG AGA AAA CTG CAC ACT A                   |          | In house |
|              |              | H3-hu-R                                           | CGT TCA ACA AAA AGG TCC CAT TTC                   |          |          |
|              |              | H3-hu-P                                           | AT680-CAC ACT GAG GGT CTC CCA ATA GAG CAT CTA-BBQ |          |          |
|              | N1av         | N1-F                                              | CCTTGCTTCTGGGTTGAACTAATC                          |          | In house |
|              |              | N1-R                                              | AGTGTCACATTTACACCACAAAAGG                         |          |          |
|              |              | N1-P                                              | ROX-TGCTCCCCTAGTCCAGATTGTGTTCTCTT-BHQ2            |          |          |
| N1pdm        | N1pdm-F      | CGAAATGAGTGCCCTAATTATC                            |                                                   | In house |          |
|              | N1pdm-R      | CGATTCGAGCCATGCCAGTTA                             |                                                   |          |          |
|              | N1pdm-P      | FAM-[+C][+C]T[+G]ATTCT[+A]GTGAAATCA[+C]-BHQ1      |                                                   |          |          |
| N2sw         | N2-F         | GAGTATGGTGGACBTCAAAYAG                            |                                                   | In house |          |
|              | N2-R         | TTGCGAAAGCTTATATAGGCATGA                          |                                                   |          |          |
|              | N2-P         | AF532-CCA TCA GGC CAT GAG CCT GAV CCA TA-BHQ1     |                                                   |          |          |
| N2hu         | N2hu-F       | CTGGTATTTCTCTGTGAAGGC                             |                                                   | In house |          |
|              | N2hu-R       | CCA SAC TTC AKT TTC CTG YTT CC                    |                                                   |          |          |
|              | N2hu-P       | AF532-T[+C]A [+A]CT CYA CAT AAA AGC ACC [+G]-BHQ1 |                                                   |          |          |



| Full length RT-PCR |            |                                           |          |
|--------------------|------------|-------------------------------------------|----------|
|                    |            |                                           |          |
| NS                 | H3NSF1     | AGC AAA AGC AGG GTG ACA AAG ACA           | In house |
|                    | H3NSR1     | AGT AGA AAC AAG GGT GTT TTT TAT           |          |
| M                  | MF8        | GCA GGT AGA TAT TGA AAG ATG AG            | In house |
|                    | MR1025     | AGA AAC AAG GTA GTT TTT TAC TC            |          |
| NA                 | pQE-NA-F   | CGGATAACAATTTACACAGAGCAAAAGCAGGAGT        | In house |
|                    | pQE-NA-R   | GTTCTGAGGTCATTACTGGAGTAGAAAACAAGGAGTTTTT  |          |
| NP                 | pQE-NP-F2  | CGGATAACAATTTACACAGAGCAAAAGCAGGGTAGATAATC | In house |
|                    | pQE-NP-R   | GTTCTGAGGTCATTACTGGAGTAGAAAACAAGGGTATTTTT |          |
| HA                 | pQE-HAs-F  | CGGATAACAATTTACACAGAGCAAAAGCAGGGGAWAATW   | In house |
|                    | pQE-HA-R   | GTTCTGAGGTCATTACTGGAGTAGAAAACAAGGGTGTTTT  |          |
| H1pdm              | pQE-HApd-F | CGGATAACAATTTACACAGAGCAAAAGCAGGGGAAAAC    | In house |
|                    | pQE-HA-R   | GTTCTGAGGTCATTACTGGAGTAGAAAACAAGGGTGTTTT  |          |
| PA                 | pQE-PA-F2  | CGGATAACAATTTACACAGAGCAAAAGCAGGTAC        | In house |
|                    | pQE-PA-R   | GTTCTGAGGTCATTACTGGAGTAGAAAACAAGGTACTT    |          |
| PB1                | pQE-PB1-F2 | CGGATAACAATTTACACAGAGCRAAAGCAGGCAAAC      | In house |
|                    | pQE-PB1-R  | GTTCTGAGGTCATTACTGGAGTAGAAAACAAGGCATTT    |          |
| PB2                | pQE-PB2-F3 | CGGATAACAATTTACACAGAGCRAAAGCAGGTCAAAT     | In house |
|                    | pQE-PB2-R  | GTTCTGAGGTCATTACTGGAGTAGAAAACAAGGTCGTTT   |          |
| Universal          | MBTuni-12  | ACGCGTGATCAGCRAAAGCAGG                    | 72       |
| IAV primers        | MBTuni-13  | ACGCGTGATCAGTAGAAAACAAGG                  |          |

879 Nucleotides are named according to the IUPAC codes. Purple color indicate the pQE part of the primers.

880 **Table 2.** Results of the evolutionary analysis of the HA gene/protein of the H1av and the H1pdm09 lineages:

|                                                                | H1pdm<br>n = 48                                                                                                         | H1pdm09 Sw-<br>L<br>n = 30                                             | H1pdm09 Hu-L<br>n = 18                                                                                                                                                                                      | H1av<br>n = 78                                              |
|----------------------------------------------------------------|-------------------------------------------------------------------------------------------------------------------------|------------------------------------------------------------------------|-------------------------------------------------------------------------------------------------------------------------------------------------------------------------------------------------------------|-------------------------------------------------------------|
| Probability of M1a/M2a<br>(%):                                 | 0.1/99.9                                                                                                                | 91/9                                                                   | 0.1/99.9                                                                                                                                                                                                    | 0.1/99.9                                                    |
| Global $\omega$ ratio:                                         | 0.27                                                                                                                    | 0.25                                                                   | 0.26                                                                                                                                                                                                        | 0.19                                                        |
| Positions with positive<br>Hu-lection (antigenic<br>site/RBS): | 142K (Sa), 154P<br>(Ca1/RBS), 172E (Sa),<br>174V (Sa), 200A (RBS),<br>202S, 204D (RBS), 206R<br>(Sb/RBS), 207T (Sb/RBS) | -                                                                      | 142K (Sa), 154P, 159K<br>(Ca1/RBS), 160G, 172E (Sa),<br>178L (Sa), <b>179N (Sa)</b> , 200A<br>(RBS), <b>202S</b> , 203D (Sb/RBS),<br>204D (RBS), 206R (Sb/RBS),<br>207T (Sb/RBS), <b>338I</b> , <b>391G</b> | 142Q (Sa),<br>159K<br>(Ca1/RBS),<br>172R (Sa),<br>173E (Sb) |
| TempEST correlation<br>coefficient                             | 0.87                                                                                                                    | 0.85                                                                   | 0.93                                                                                                                                                                                                        | 0.56                                                        |
| Substitution rate                                              | $4.9 \times 10^{-3}$ per site per year<br>= 8.3 nt substitutions per<br>year                                            | $4.6 \times 10^{-3}$ per<br>site per year<br>= 7.8 nt<br>substitutions | $6.1 \times 10^{-3}$ per site per year<br>= 10.4 nt substitutions per year                                                                                                                                  | $4.6 \times 10^{-3}$<br>per site per<br>year<br>= 7.8 nt    |

881 Positions in the aa sequences are numbered from the first methionine. Also identified as a divergent position  
 882 in the French study. “nt substitutions per year” is calculated based on the length of the HA gene (1701nts)  
 883 and represents the number of substitutions for the entire gene per year.

884 **Table 3.** Mutations of the H1pdm09 defining the Danish swine divergent clusters in relation to the seasonal-  
 885 like H1pdm09 sequences.

| Aa change Hu-L<br>→ Sw-L   | Prevalence in<br>the Danish Sw-<br>L sequences | Prevalence in<br>the Danish Hu-<br>L sequences | Prevalence in<br>the foreign<br>sequences of the<br>Sw-L cluster | Prevalence in<br>the foreign<br>swine H1pdm09<br>sequences* <sup>1</sup> | Prevalence in the<br>human seasonal<br>H1pdm09<br>sequences | Antigenic<br>site/RBS |
|----------------------------|------------------------------------------------|------------------------------------------------|------------------------------------------------------------------|--------------------------------------------------------------------------|-------------------------------------------------------------|-----------------------|
| N16D                       | 28/30                                          | 0/18                                           | 11/11                                                            | 0/42                                                                     | 0/59                                                        | -                     |
| N/D114N/H*                 | 27/30                                          | 6/18                                           | 11/11                                                            | 38/42                                                                    | 21/59                                                       | -                     |
| <b>P141T</b>               | 30/30                                          | 0/18                                           | 11/11                                                            | 0/42                                                                     | 0/59                                                        | Sa                    |
| N/G/K142D                  | 29/30                                          | 4/18                                           | 11/11                                                            | 6/42                                                                     | 0/59                                                        | Sa                    |
| <b>H143N/D/E</b>           | 30/30                                          | 0/18                                           | 11/11                                                            | 0/42                                                                     | 0/59                                                        | Sa                    |
| D144N/K                    | 26/30                                          | 0/18                                           | 10/11                                                            | 0/42                                                                     | 0/59                                                        | -                     |
| S145L                      | 28/30                                          | 0/18                                           | 7/11                                                             | 0/42                                                                     | 0/59                                                        | -                     |
| <b>N/S/D146K/E</b>         | 30/30                                          | 0/18                                           | 11/11                                                            | 0/42                                                                     | 0/59                                                        | RBS                   |
| <b>N/Q/K147E</b>           | 30/30                                          | 0/18                                           | 11/11                                                            | 0/42                                                                     | 0/59                                                        | RBS                   |
| A152S                      | 30/30                                          | 2/18                                           | 11/11                                                            | 0/42                                                                     | 0/59                                                        | RBS                   |
| N/K/R159S                  | 29/30                                          | 0/18                                           | 11/11                                                            | 0/42                                                                     | 0/59                                                        | Ca1/RBS               |
| <b>G/E/R/V172T/<br/>M*</b> | 30/30                                          | 0/18                                           | 11/11                                                            | 0/42                                                                     | 0/59                                                        | Sa                    |
| N/S/K173D/G                | 28/30                                          | 0/18                                           | 11/11                                                            | 1/42                                                                     | 0/59                                                        | Sb                    |
| <b>K/E/A/Q180I</b>         | 30/30                                          | 0/18                                           | 11/11                                                            | 0/42                                                                     | 0/59                                                        | Sa                    |
| D185N                      | 24/30                                          | 0/18                                           | 11/11                                                            | 0/42                                                                     | 0/59                                                        | Ca1                   |
| T/S/N/D202A*               | 28/30                                          | 0/18                                           | 11/11                                                            | 0/42                                                                     | 0/59                                                        | -                     |
| S/T/W/E207R                | 27/30                                          | 4/18                                           | 11/11                                                            | 1/42                                                                     | 0/59                                                        | Sb/RBS                |
| D239N                      | 27/30                                          | 2/18                                           | 11/11                                                            | 0/42                                                                     | 0/59                                                        | Ca2/RBS               |
| <b>K319Q</b>               | 30/30                                          | 0/18                                           | 11/11                                                            | 0/42                                                                     | 0/59                                                        | -                     |
| I/V/T338D*                 | 29/30                                          | 0/18                                           | 10/11                                                            | 0/42                                                                     | 0/59                                                        | -                     |

886 Positions in the aa sequences are numbered from the first methionine. Bold letters indicate the mutations that  
 887 are unique to the Danish swine divergent cluster. \* position also identified to be divergent in the French  
 888 study. \*<sup>1</sup> also including the French SwD sequences.

889 **Table 4.** Results of the evolutionary analysis of the NA gene of the N1pdm, N1av, N2sw and N2hu lineages:

|                                       | N1pdm                | N1av                 | N2sw                 | N2hu  |
|---------------------------------------|----------------------|----------------------|----------------------|-------|
| Probability of M1a/M2a (%):           | 90/10                | 73/27                | 88/12                | 88/12 |
| Global $\omega$ ratio:                | 0.24                 | 0.15                 | 0.17                 | 0.18  |
| Positions with positive Hu-Lection:   | -                    | -                    | -                    | -     |
| TempEST correlation coefficient       | 0.88                 | 0.68                 | 0.75                 | 0.62  |
| Substitution rate (per site per year) | $3.9 \times 10^{-3}$ | $5.9 \times 10^{-3}$ | $4.4 \times 10^{-3}$ | N.A   |

890 **Figures**

891 Fig. 1. The annual and monthly number of submissions received from Danish pigs with acute respiratory  
892 disease in the years 2011 to 2018.

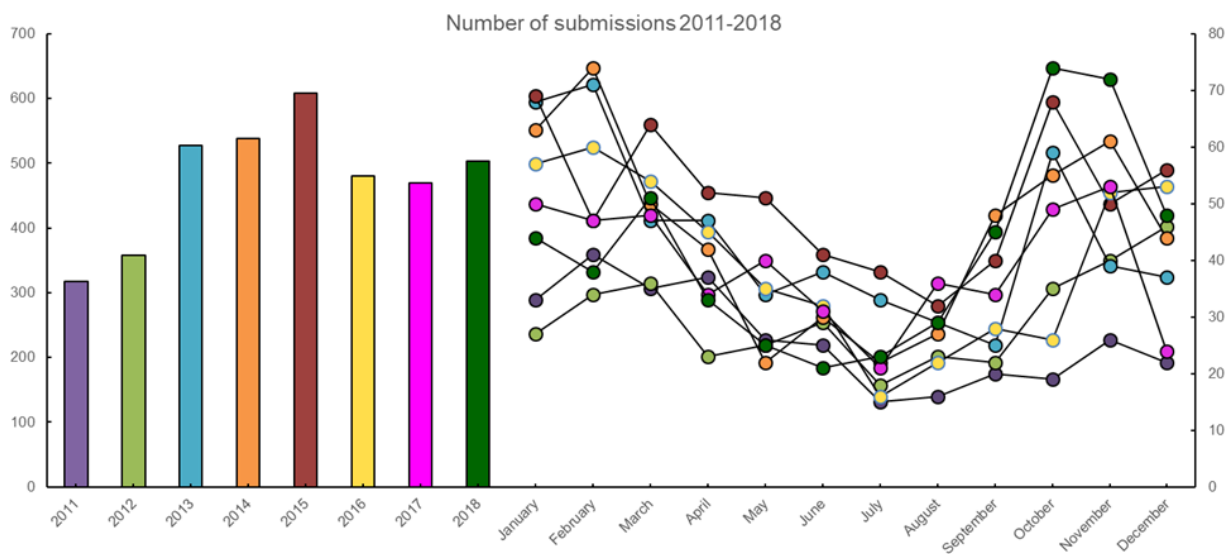

893

894 Fig. 2. The percentages of submissions testing positive and negative for influenza A virus and the proportion  
895 of positive submission testing positive for H1pdm09 by real time RT-PCR from 2011-2018.

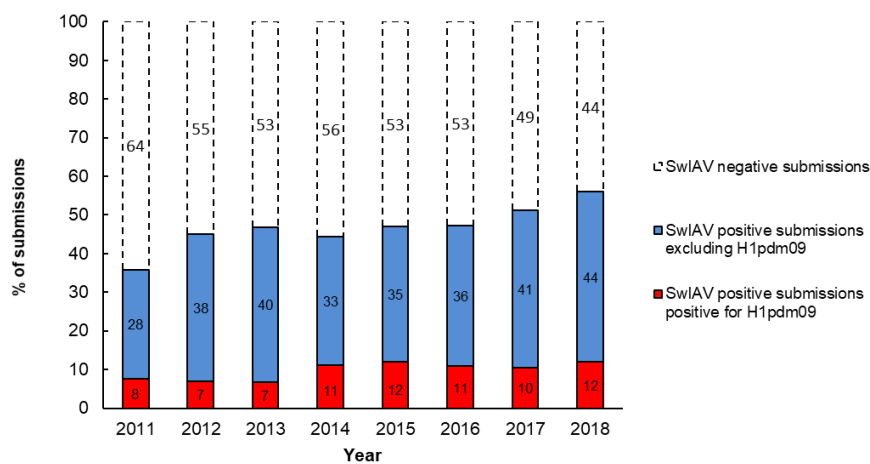

896

897 Fig. 3. The percentages of the swIAV positive submissions testing positive in the screening for H1pdm09 by  
898 real time RT-PCR from 2011-2018.

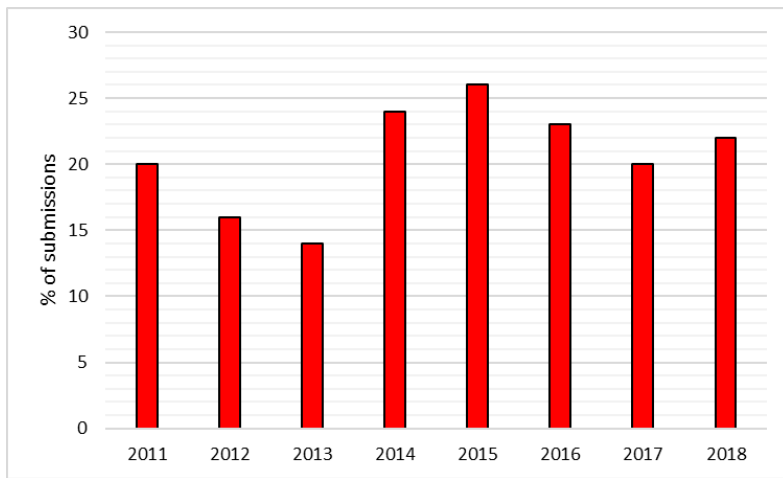

899

900 Fig. 4. Subtype distribution shown as the percentage of total number of subtyped submissions from 2011-  
901 2018.

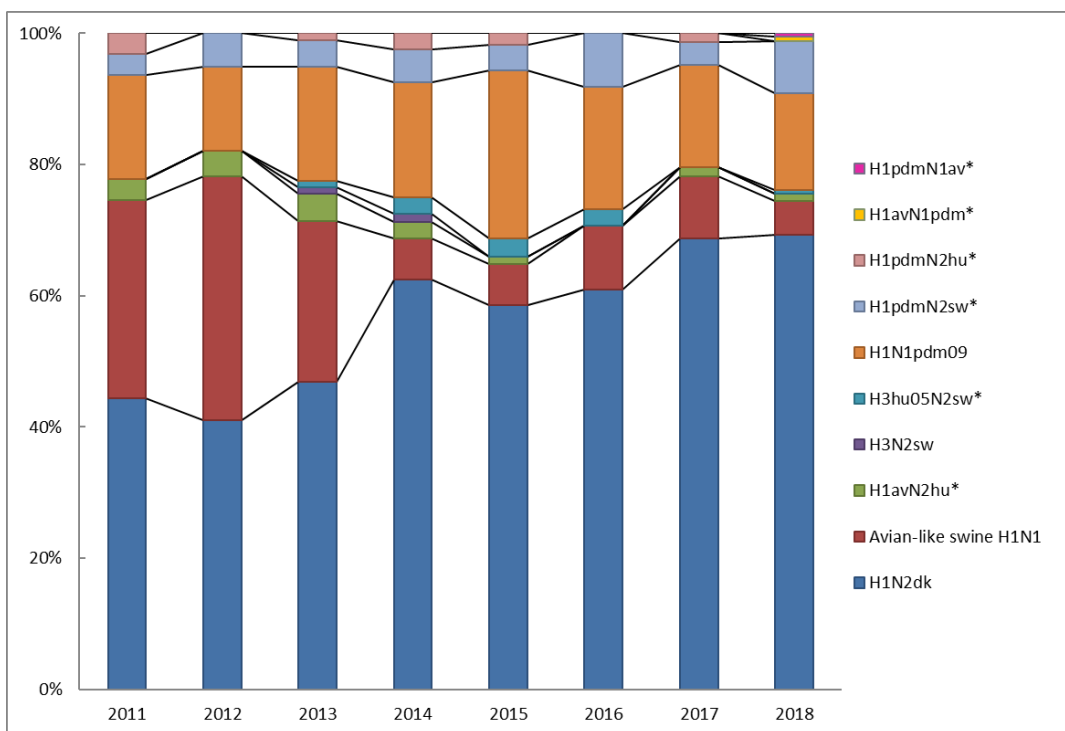

902

903 “\*” Indicates the “novel” subtypes discovered during the surveillance.

904

905

906 Fig. 5. Bayesian phylogenetic tree of the H1av nucleotide sequences.

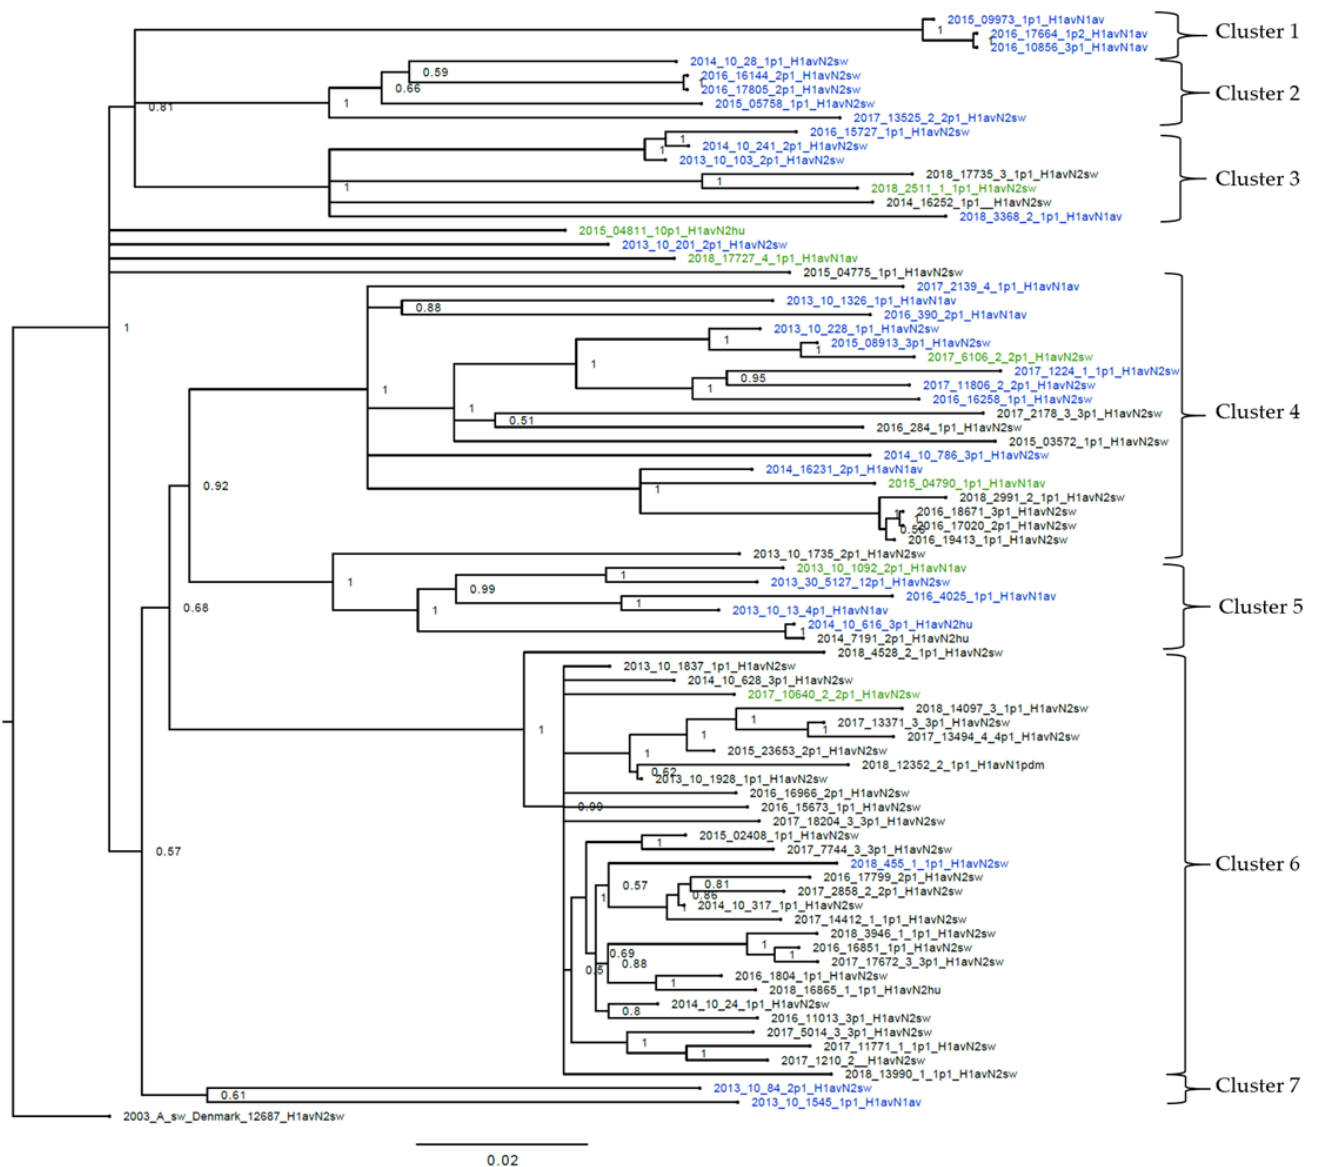

907

908 Node labels represent posterior probabilities. “2003\_A\_sw\_Denmark\_12687” is the outgroup. The taxon  
909 includes the year wherefrom the sample were obtained, the sample ID and subtype. A blue taxon indicates  
910 that the internal gene cassette is of avian-like swine origin, a green internal gene cassette indicates that the  
911 internal cassette has a mix of avian-like swine and H1N1pdm genes and a black taxon indicates that the  
912 internal gene cassette is of H1N1pdm09 origin.

913

914

915

916 Fig. 6. Strict molecular clock tree of the Danish H1pdm09 sequences.

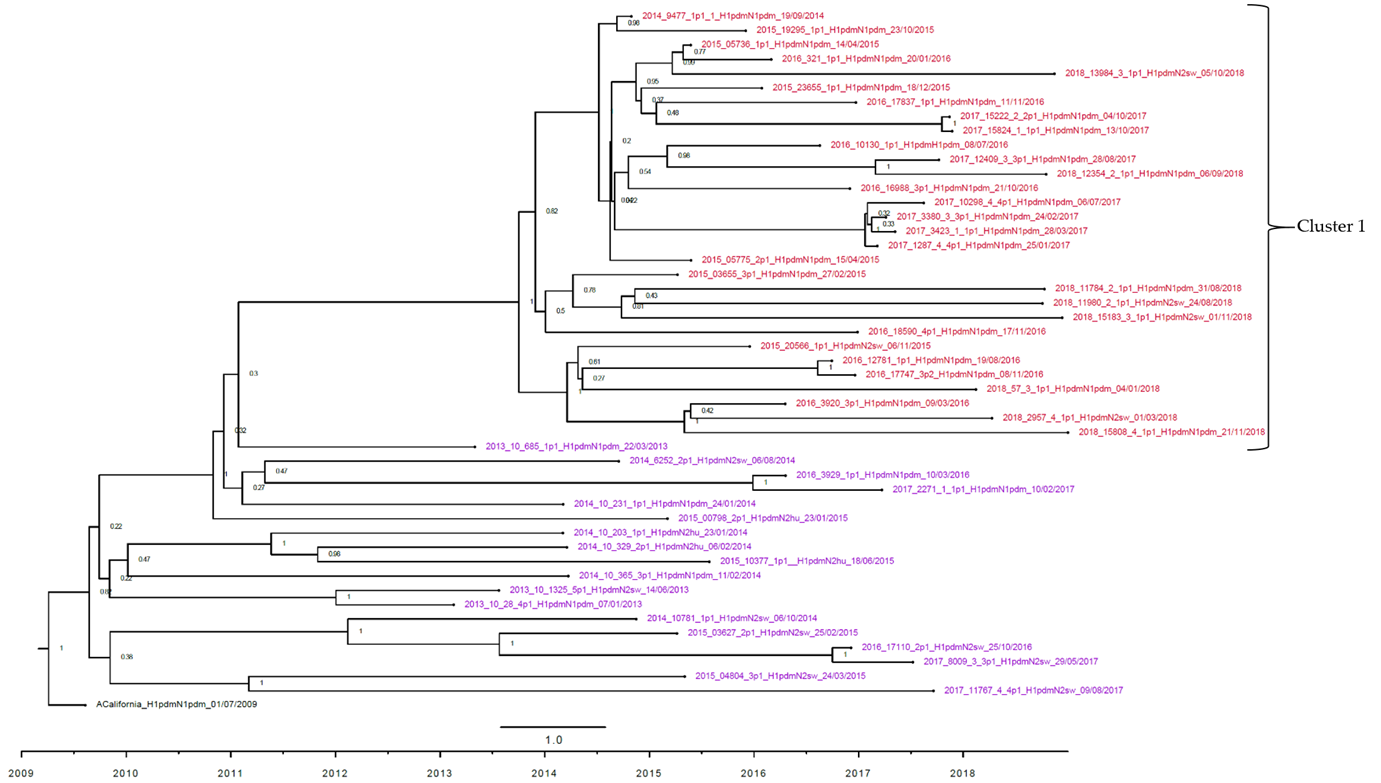

917

918 Node labels represent posterior probabilities. The x-axis represents the time in years, and each tick indicates  
919 half a year. The taxon includes the year wherefrom the sample were obtained, the sample ID and subtype. A  
920 red taxon indicates samples included in “Cluster 1” and a purple taxon indicates samples located outside  
921 “Cluster 1”.

922

923

924

925

926

927

928

929





942 Fig. 8. Genotypes of the different Danish swIAV isolates from 2013-2018.

|                                                         | H1    | H3   | N1    | N2   | M     | NP               | NS    | PA    | PB1   | PB2   | Genotype (Watson*) |
|---------------------------------------------------------|-------|------|-------|------|-------|------------------|-------|-------|-------|-------|--------------------|
| <b>H1N2dk</b>                                           |       |      |       |      |       |                  |       |       |       |       |                    |
| Genotype 1                                              | Blue  | Grey | Grey  | Blue | Blue  | Blue             | Blue  | Blue  | Blue  | Blue  | D                  |
| Genotype 2                                              | Blue  | Grey | Grey  | Blue | Blue  | Green            | Green | Green | Green | Green | -                  |
| Genotype 3                                              | Blue  | Grey | Grey  | Blue | Green | Green            | Blue  | Green | Green | Green | -                  |
| Genotype 4                                              | Blue  | Grey | Grey  | Blue | Green | Green            | Green | Green | Green | Green | T                  |
| <b>Avian-like H1N1</b>                                  |       |      |       |      |       |                  |       |       |       |       |                    |
| Genotype 1                                              | Blue  | Grey | Blue  | Grey | Blue  | Blue             | Blue  | Blue  | Blue  | Blue  | A                  |
| Genotype 2                                              | Blue  | Grey | Grey  | Grey | Green | Blue             | Blue  | Blue  | Blue  | Blue  | M                  |
| Genotype 3                                              | Blue  | Grey | Blue  | Grey | Blue  | Green            | Blue  | Blue  | Blue  | Blue  | -                  |
| Genotype 4                                              | Blue  | Grey | Blue  | Grey | Blue  | Green            | Green | Green | Green | Green | -                  |
| <b>H1N2hu</b>                                           |       |      |       |      |       |                  |       |       |       |       |                    |
| Genotype 1                                              | Blue  | Grey | Grey  | Red  | Blue  | Blue             | Blue  | Blue  | Blue  | Blue  | I                  |
| Genotype 2                                              | Blue  | Grey | Grey  | Red  | Green | Blue             | Blue  | Blue  | Blue  | Blue  | -                  |
| Genotype 3                                              | Blue  | Grey | Grey  | Red  | Green | Green            | Green | Green | Green | Green | -                  |
| <b>H1N1pdm09</b>                                        |       |      |       |      |       |                  |       |       |       |       |                    |
| Genotype 1                                              | Green | Grey | Green | Grey | Green | Green            | Green | Green | Green | Green | P                  |
| <b>H1pdm09N2sw</b>                                      |       |      |       |      |       |                  |       |       |       |       |                    |
| Genotype 1                                              | Green | Grey | Grey  | Blue | Blue  | Green            | Green | Green | Green | Green | -                  |
| Genotype 2                                              | Green | Grey | Grey  | Blue | Green | Green            | Green | Green | Green | Green | R                  |
| <b>H1pdm09N2hu</b>                                      |       |      |       |      |       |                  |       |       |       |       |                    |
| Genotype 1                                              | Green | Grey | Grey  | Red  | Green | Green            | Green | Green | Green | Green | -                  |
| <b>H3hu05N2sw</b>                                       |       |      |       |      |       |                  |       |       |       |       |                    |
| Genotype 1                                              | Grey  | Red  | Grey  | Blue | Green | Green            | Green | Green | Green | Green | -                  |
| <b>H1avN1pdm09</b>                                      |       |      |       |      |       |                  |       |       |       |       |                    |
| Genotype 1                                              | Blue  | Grey | Green | Grey | Green | Green            | Green | Green | Green | Green | -                  |
| <b>Color-code:</b>                                      |       |      |       |      |       |                  |       |       |       |       |                    |
| Enzootic swine origin (avian-like H1N1, H1N2dk, H3N2sw) |       |      |       |      |       | H1N1pdm09 origin |       |       |       |       |                    |
| Seasonal human H3N2 origin                              |       |      |       |      |       | Not applicable   |       |       |       |       |                    |

943

944 Fig. 9. Percentage of H1N2dk isolates containing at least one gene of H1N1pdm09 origin.

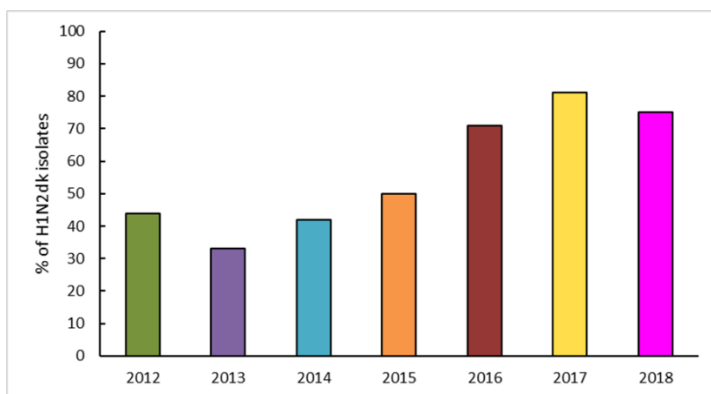

945

946 For the year 2011 very few sequences of H1N2dk was available and therefore the data was not included in  
947 the figure.

1 **Supplementary tables**

2 Supplementary table 1 – list of H1pdm09 reference sequences included in Fig 7.

| <b>Strain name</b>                 | <b>Accession #<br/>NCBI<br/>Genbank</b> | <b>Accession #<br/>GISAID</b> |
|------------------------------------|-----------------------------------------|-------------------------------|
| A_Swine_Steinberg_21495_2015       | MK367335                                |                               |
| A_Swine_Diepholz_21603_2015        | MK367343                                |                               |
| A_Swine_Soegel_22071_2015          | MK367375                                |                               |
| A_Swine_Luedinghausen_21728_2015   | MK367359                                |                               |
| A_Swine_Lastrup_22382_2015         | MK340469                                |                               |
| A_Swine_Bad_Wuennenberg_20977_2014 | MK367191                                |                               |
| A_Swine_Bad_Wuennenberg_20518_2014 | MK367119                                |                               |
| A_Swine_Steinfeld_21010_2014       | MK367215                                |                               |
| A_Swine_Rosendahl_20634_2014       | MK367127                                |                               |
| A_Swine_Italy_105389_2014          | KU322847                                |                               |
| A_Swine_Wachtum_20657_2014         | MK367143                                |                               |
| A_Swine_Wolfhagen_21852_2015       | MK340413                                |                               |
| A_Swine_Cloppenburg_17355_2013     | MK339797                                |                               |
| A_Swine_Italy_124953_2014          | KU322863                                |                               |
| A_Swine_France_40_160120_2016_SwD  | MH785046                                |                               |
| A_Swine_France_01_150203_2015_SwD  | MH785030                                |                               |
| A_Swine_France_65_160089_2016_SwD  | KY364088                                |                               |
| A_Swine_France_40_160098_2016_SwD  | KY364104                                |                               |
| A_Swine_France_12_150058_2015_SwD  | KY241117                                |                               |
| A_Denmark_48_2015                  |                                         | EPI706898                     |
| A_Denmark_53_2016                  |                                         | EPI917121                     |
| A_Swine_France_35_160233_2016_SeL  | MH785070                                |                               |
| A_Stockholm_9_2017                 |                                         | EPI1103644                    |
| A_Stockholm_74_2015                |                                         | EPI710002                     |
| A_Swine_France_AR9191_2016_SeL     |                                         | EPI1080448                    |
| A_Denmark_62_2015                  |                                         | EPI697697                     |
| A_Denmark_45_2015                  |                                         | EPI686710                     |
| A_Denmark_40_2015                  |                                         | EPI676494                     |
| A_Swine_France_72_160174_2016_SeL  | KY364168                                |                               |
| A_New_York_05_2016                 | KX408363                                |                               |
| A_Denmark_1849_2018                |                                         | EPI1354655                    |
| A_Denmark_1808_2018                |                                         | EPI1332036                    |
| A_Denmark_1799_2018                |                                         | EPI1332024                    |
| A_Denmark_792_2018                 |                                         | EPI1274824                    |
| A_Denmark_101_2018                 |                                         | EPI1191938                    |
| A_New_York_6810_2018               | MH885224                                |                               |

---

|                                     |          |            |
|-------------------------------------|----------|------------|
| A_Denmark_1798_2018                 |          | EPI1332039 |
| A_Denmark_1841_2018                 |          | EPI1354651 |
| A_Denmark_1804_2018                 |          | EPI1332030 |
| A_Denmark_1831_2018                 |          | EPI1371209 |
| A_Denmark_2_2018                    |          | EPI1170222 |
| A_Denmark_131_2018                  |          | EPI1191946 |
| A_Denmark_40_2018                   |          | EPI1191954 |
| A_Denmark_17_2018                   |          | EPI1170238 |
| A_Denmark_94_2018                   |          | EPI1191930 |
| A_Denmark_26_2018                   |          | EPI1274860 |
| A_Denmark_61_2018                   |          | EPI1191962 |
| A_Denmark_3_2018                    |          | EPI1170246 |
| A_Denmark_793_2018                  |          | EPI1274826 |
| A_Denmark_59_2018                   |          | EPI1191970 |
| A_Denmark_43_2018                   |          | EPI1191914 |
| A_Denmark_1792_2018                 |          | EPI1332015 |
| A_Denmark_1823_2018                 |          | EPI1371207 |
| A_Denmark_1818_2018                 |          | EPI1371201 |
| A_Denmark_1811_2018                 |          | EPI1332033 |
| A_Swine_France_64_1052_2015_SwD     | MH785062 |            |
| A_Swine_LaReunion_0164_2010         |          | EPI451121  |
| A_Swine_Altenberge_IDT14252_2011    | KC222604 |            |
| A_Swine_Ankum_Stockum_IDT13531_2011 | KC222540 |            |
| A_Swine_Papenburg_IDT12653_2010     | KC222524 |            |
| A_Denmark_51_2014                   |          | EPI561755  |
| A_Denmark_50_2014                   |          | EPI561753  |
| A_Swine_France_AR271_2016_SeL       |          | EPI1080446 |
| A_Swine_France_AR2675_2015_SeL      |          | EPI1080442 |
| A_Denmark_33_2015                   |          | EPI623800  |
| A_Denmark_34_2015                   |          | EPI623802  |
| A_Sweden_18_2015                    | KT898919 |            |
| A_Swine_Hungary_362_2011            |          | EPI398155  |
| A_Swine_Hedmark_P249_4_2011         |          | EPI378465  |
| A_Swine_Hedmark_P249_1_2011         |          | EPI378463  |
| A_Swine_Sarthe_0262_2010            | FR871195 |            |
| A_Denmark_106_2013                  |          | EPI500156  |
| A_Denmark_101_2013                  |          | EPI503203  |
| A_Helsinki_303N_2014                |          | KM219199   |
| A_Swine_Cotes_dArmor_110466_2010    | KC345640 |            |
| A_Swine_Hedmark_A173_2011           |          | EPI441603  |
| A_Swine_France_57_140136_2014_SeL   | MH785054 |            |
| A_Swine_Hedmark_A66_2_2011          |          | EPI378467  |

---

---

|                                    |           |
|------------------------------------|-----------|
| A_Denmark_27_2011                  | EPI313174 |
| A_Swine_Hedmark_A66_1_2011         | EPI378466 |
| A_Denmark_70_2012                  | EPI406231 |
| A_Denmark_08_2013                  | EPI425964 |
| A_Swine_France_35_140382_2014_SeL  | MH785038  |
| A_Swine_France_35_140384_2014_SeL  | MH785075  |
| A_Swine_Oppland_A2_2013            | EPI440999 |
| A_Denmark_76_2012                  | EPI425966 |
| A_Helsinki_1215_2013               | KM366407  |
| A_Sweden_129_2013                  | EPI484358 |
| A_Swine_4_Mexico_2009              | CY053645  |
| A_Swine_Iceland_R117_2011          | EPI356441 |
| A_Denmark_20_2011                  | EPI313159 |
| A_Swine_England_73690_2010         | EPI310235 |
| A_California_07_2009               | FJ969540  |
| A_Swine_Italy_85429_2009           | EPI247131 |
| A_Swine_Germany_SH_R387_2010       | EPI301657 |
| A_Swine_Italy_290271_2009          | EPI253898 |
| A_Swine_Germany_NW_R708_2010       | EPI301665 |
| A_Copenhagen_INS96_2009            | CY056971  |
| A_Netherlands_2229_2009            | CY065856  |
| A_Swine_Norway_02_11342_2009       | EPI347280 |
| A_Odense_INS308_2009               | CY072254  |
| A_Denmark_48_2012                  | EPI390465 |
| A_Swine_Hedmark_A114_2011          | EPI378468 |
| A_England_687_2010                 | LN850054  |
| A_Stockholm_1_2012                 | EPI358062 |
| A_Swine_Ebblinghof_IDT12991_1_2011 | KC222532  |
| A_Denmark_24_2011                  | EPI313166 |
| A_Aarhus_INS613_2011               | CY129934  |
| A_Swine_Germany_MV_Wessin8_2011    | EPI356433 |
| A_Denmark_26_2011                  | EPI313173 |
| A_Denmark_71_11                    | CY090816  |
| A_England_05140283_2010            | LN867828  |

---

3

4

5

6

7

8 Supplementary table 2 – the genotype of all full genome sequenced samples

|                   | H1 | H3 | N1 | N2 | M | NP | NS | PA | PB1 | PB2 | Accession no. |
|-------------------|----|----|----|----|---|----|----|----|-----|-----|---------------|
| <b>H1N2dk</b>     |    |    |    |    |   |    |    |    |     |     |               |
| 2013-10-84-2p1    |    |    |    |    |   |    |    |    |     |     | MT666504-11   |
| 2013-10-103-2p1   |    |    |    |    |   |    |    |    |     |     | MT666441-47   |
| 2013-10-201-2p1   |    |    |    |    |   |    |    |    |     |     | MT666821-28   |
| 2013-10-228-1p1   |    |    |    |    |   |    |    |    |     |     | MT666356-62   |
| 2013-30-5127-12p1 |    |    |    |    |   |    |    |    |     |     | MT666789-96   |
| 2013-10-1735-2p1  |    |    |    |    |   |    |    |    |     |     | MT666757-64   |
| 2013-10-1837-1p1  |    |    |    |    |   |    |    |    |     |     | MT666694-01   |
| 2013-10-1928-1p1  |    |    |    |    |   |    |    |    |     |     | MT666702-09   |
| 2014-10-24-1p1    |    |    |    |    |   |    |    |    |     |     | MT666734-41   |
| 2014-10-28-1p1    |    |    |    |    |   |    |    |    |     |     | MT666480-87   |
| 2014-10-241-1p1   |    |    |    |    |   |    |    |    |     |     | MT666433-40   |
| 2014-10-317-1p1   |    |    |    |    |   |    |    |    |     |     | MT666742-49   |
| 2014-10-628-3p1   |    |    |    |    |   |    |    |    |     |     | MT666662-69   |
| 2014-10-786-3p1   |    |    |    |    |   |    |    |    |     |     | MT666280-87   |
| 2014-16252-1p1    |    |    |    |    |   |    |    |    |     |     | MT666418-25   |
| 2015-02408-1p1    |    |    |    |    |   |    |    |    |     |     | MT666686-93   |
| 2015-03572-1p1    |    |    |    |    |   |    |    |    |     |     | MT666272-79   |
| 2015-04775-1p1    |    |    |    |    |   |    |    |    |     |     | MT666248-55   |
| 2015-05758-1p1    |    |    |    |    |   |    |    |    |     |     | MT666472-79   |
| 2015-08913-3p1    |    |    |    |    |   |    |    |    |     |     | MT666363-70   |
| 2015-23653-2p1    |    |    |    |    |   |    |    |    |     |     | MT666710-17   |
| 2016-284-1p1      |    |    |    |    |   |    |    |    |     |     | MT666348-55   |
| 2016-1804-1p1     |    |    |    |    |   |    |    |    |     |     | MT666638-45   |
| 2016-11013-3p1    |    |    |    |    |   |    |    |    |     |     | MT666630-37   |
| 2016-15673-1p1    |    |    |    |    |   |    |    |    |     |     | MT666583-90   |
| 2016-15727-1p1    |    |    |    |    |   |    |    |    |     |     | MT666426-32   |
| 2016-16144-2p1    |    |    |    |    |   |    |    |    |     |     | MT666488-95   |
| 2016-16258-1p1    |    |    |    |    |   |    |    |    |     |     | MT666386-93   |
| 2016-16851-1p1    |    |    |    |    |   |    |    |    |     |     | MT666567-74   |
| 2016-16966-2p1    |    |    |    |    |   |    |    |    |     |     | MT666591-97   |
| 2016-17020-2p1    |    |    |    |    |   |    |    |    |     |     | MT666319-25   |
| 2016-17799-2p1    |    |    |    |    |   |    |    |    |     |     | MT666718-25   |
| 2016-17805-2p1    |    |    |    |    |   |    |    |    |     |     | MT666496-03   |
| 2016-18671-3p1    |    |    |    |    |   |    |    |    |     |     | MT666312-18   |
| 2016-19413-1p1    |    |    |    |    |   |    |    |    |     |     | MT666326-32   |
| 2017-1224-1p1     |    |    |    |    |   |    |    |    |     |     | MT666378-85   |
| 2017-1210-2p1     |    |    |    |    |   |    |    |    |     |     | MT666551-58   |
| 2017-2178-3p1     |    |    |    |    |   |    |    |    |     |     | MT666288-95   |
| 2017-2858-2p1     |    |    |    |    |   |    |    |    |     |     | MT666750-56   |
| 2017-5014-3p1     |    |    |    |    |   |    |    |    |     |     | MT666614-21   |
| 2017-6106-2p1     |    |    |    |    |   |    |    |    |     |     | MT666371-77   |
| 2017-7744-3p1     |    |    |    |    |   |    |    |    |     |     | MT666654-61   |
| 2017-10640-2p1    |    |    |    |    |   |    |    |    |     |     | MT666606-13   |
| 2017-11771-1p1    |    |    |    |    |   |    |    |    |     |     | MT666543-50   |
| 2017-11806-2p1    |    |    |    |    |   |    |    |    |     |     | MT666394-01   |
| 2017-13371-3p1    |    |    |    |    |   |    |    |    |     |     | MT666670-77   |
| 2017-13494-4p1    |    |    |    |    |   |    |    |    |     |     | MT666678-85   |
| 2017-13525-2p1    |    |    |    |    |   |    |    |    |     |     | MT666464-71   |
| 2017-14412-1p1    |    |    |    |    |   |    |    |    |     |     | MT666726-33   |
| 2017-17672-3p1    |    |    |    |    |   |    |    |    |     |     | MT666575-82   |
| 2017-18204-3p1    |    |    |    |    |   |    |    |    |     |     | MT666536-42   |
| 2018-455-1-1p1    |    |    |    |    |   |    |    |    |     |     | MT666528-35   |
| 2018-2511-1-1p1   |    |    |    |    |   |    |    |    |     |     | MT666456-63   |



|                  |  |  |  |  |  |  |  |  |  |  |  |             |
|------------------|--|--|--|--|--|--|--|--|--|--|--|-------------|
| 2018-2991-2-1p1  |  |  |  |  |  |  |  |  |  |  |  | MT666304-11 |
| 2018-3946-1-1p1  |  |  |  |  |  |  |  |  |  |  |  | MT666559-66 |
| 2018-4528-2-1p1  |  |  |  |  |  |  |  |  |  |  |  | MT666512-19 |
| 2018-13990-1-1p1 |  |  |  |  |  |  |  |  |  |  |  | MT666520-27 |
| 2018-14097-3-1p1 |  |  |  |  |  |  |  |  |  |  |  | MT666598-05 |
| 2018-17735-3-1p1 |  |  |  |  |  |  |  |  |  |  |  | MT666448-55 |
| Avian-like H1N1  |  |  |  |  |  |  |  |  |  |  |  |             |
| 2013-10-13-4p1   |  |  |  |  |  |  |  |  |  |  |  | MT666805-12 |
| 2013-10-1092-2p1 |  |  |  |  |  |  |  |  |  |  |  | MT666781-88 |
| 2013-10-1326-1p1 |  |  |  |  |  |  |  |  |  |  |  | MT666296-03 |
| 2013-10-1545-1p1 |  |  |  |  |  |  |  |  |  |  |  | MT666813-20 |
| 2014-16231-3p1   |  |  |  |  |  |  |  |  |  |  |  | MT666341-47 |
| 2015-4790-1p1    |  |  |  |  |  |  |  |  |  |  |  | MT666333-40 |
| 2015-09973-1p1   |  |  |  |  |  |  |  |  |  |  |  | MT666225-32 |
| 2016-390-2p1     |  |  |  |  |  |  |  |  |  |  |  | MT666264-71 |
| 2016-4025-1p1    |  |  |  |  |  |  |  |  |  |  |  | MT666797-04 |
| 2016-10856-3p1   |  |  |  |  |  |  |  |  |  |  |  | MT666240-47 |
| 2016-17664-1p2   |  |  |  |  |  |  |  |  |  |  |  | MT666233-39 |
| 2017-2139-4      |  |  |  |  |  |  |  |  |  |  |  | MT666256-63 |
| 2018-3368-2-1p1  |  |  |  |  |  |  |  |  |  |  |  | MT666410-17 |
| 2018-17727-4-1p1 |  |  |  |  |  |  |  |  |  |  |  | MT666402-09 |
| H1avN2hu         |  |  |  |  |  |  |  |  |  |  |  |             |
| 2014-10-616-3p1  |  |  |  |  |  |  |  |  |  |  |  | MT666765-72 |
| 2014-7191-2p1    |  |  |  |  |  |  |  |  |  |  |  | MT666773-80 |
| 2015-04811-10p1  |  |  |  |  |  |  |  |  |  |  |  | MT666829-36 |
| 2018-16865-1-1p1 |  |  |  |  |  |  |  |  |  |  |  | MT666646-53 |
| H1N1pdm09        |  |  |  |  |  |  |  |  |  |  |  |             |
| 2013-10-28-4p1   |  |  |  |  |  |  |  |  |  |  |  | MT667172-78 |
| 2013-10-685-1p1  |  |  |  |  |  |  |  |  |  |  |  | MT667203-09 |
| 2014-10-231-1p1  |  |  |  |  |  |  |  |  |  |  |  | MT667210-17 |
| 2014-10-365-3p1  |  |  |  |  |  |  |  |  |  |  |  | MT667156-63 |
| 2014-9477-1p1    |  |  |  |  |  |  |  |  |  |  |  | MT667060-67 |
| 2015-03655-3p1   |  |  |  |  |  |  |  |  |  |  |  | MT666996-03 |
| 2015-05736-1p1   |  |  |  |  |  |  |  |  |  |  |  | MT667068-75 |
| 2015-05775-2p1   |  |  |  |  |  |  |  |  |  |  |  | MT667036-43 |
| 2015-19295-1p1   |  |  |  |  |  |  |  |  |  |  |  | MT667044-51 |
| 2015-23655-1p1   |  |  |  |  |  |  |  |  |  |  |  | MT667004-11 |
| 2016-321-1p1     |  |  |  |  |  |  |  |  |  |  |  | MT667052-59 |
| 2016-3920-3p1    |  |  |  |  |  |  |  |  |  |  |  | MT666957-64 |
| 2016-3929-1p1    |  |  |  |  |  |  |  |  |  |  |  | MT667187-94 |
| 2016-10130-1p1   |  |  |  |  |  |  |  |  |  |  |  | MT666988-95 |
| 2016-12781-1p1   |  |  |  |  |  |  |  |  |  |  |  | MT666933-40 |
| 2016-16988-3p1   |  |  |  |  |  |  |  |  |  |  |  | MT666980-87 |
| 2016-17747-3p2   |  |  |  |  |  |  |  |  |  |  |  | MT666941-48 |
| 2016-17837-1p1   |  |  |  |  |  |  |  |  |  |  |  | MT667028-35 |
| 2016-18590-4p1   |  |  |  |  |  |  |  |  |  |  |  | MT666885-92 |
| 2017-1287-4p1    |  |  |  |  |  |  |  |  |  |  |  | MT666909-16 |
| 2017-2271-1p1    |  |  |  |  |  |  |  |  |  |  |  | MT667179-86 |
| 2017-3380-3p1    |  |  |  |  |  |  |  |  |  |  |  | MT666917-24 |
| 2017-3423-1p1    |  |  |  |  |  |  |  |  |  |  |  | MT666925-32 |
| 2017-10298-4p1   |  |  |  |  |  |  |  |  |  |  |  | MT666901-08 |
| 2017-12409-3p1   |  |  |  |  |  |  |  |  |  |  |  | MT666965-71 |
| 2017-15222-2p1   |  |  |  |  |  |  |  |  |  |  |  | MT667012-19 |
| 2017-15824-1p1   |  |  |  |  |  |  |  |  |  |  |  | MT666845-52 |
| 2018-57-3-1p1    |  |  |  |  |  |  |  |  |  |  |  | MT666853-60 |
| 2018-11784-2-1p1 |  |  |  |  |  |  |  |  |  |  |  | MT666877-84 |



20 Supplementary table 3 – residues examined for specific mutations involving host adaptation, virulence,  
 21 pathogenicity and dominating residues differing between avian-like and H1N1pdm09 origin viruses.

| Protein and residue/aa change                           | Function                                                                                                                          | H1av-origin                           | H1N1pdm09 origin                                                                                                   |
|---------------------------------------------------------|-----------------------------------------------------------------------------------------------------------------------------------|---------------------------------------|--------------------------------------------------------------------------------------------------------------------|
| <b>PB2</b>                                              |                                                                                                                                   |                                       |                                                                                                                    |
| T271A                                                   | Dominant residue differ between avian- and H1N1pdm09 viruses <sup>59</sup>                                                        | 35/36 had T<br>1/36 had I             | 85/85 had A                                                                                                        |
| E627K                                                   | Increased viral replication and virulence <sup>84</sup>                                                                           | 0/78                                  | 0/48                                                                                                               |
| D701N                                                   | Enhance viral replication and pathogenicity of Eurasian avian like swIAV <sup>85</sup>                                            | 36/78                                 | 0/48                                                                                                               |
| K702R                                                   | Host-adaption; at this residue avian influenza carries lysine while most mammalian IAV carry an arginine <sup>86</sup>            | 0/78                                  | 0/48                                                                                                               |
| <b>PB1</b>                                              |                                                                                                                                   |                                       |                                                                                                                    |
| V336I                                                   | Dominant residue differ between avian- and H1N1pdm09 viruses <sup>59</sup>                                                        | 34/37 had V<br>3/37 had I             | 87/87 had I                                                                                                        |
| <b>PA</b>                                               |                                                                                                                                   |                                       |                                                                                                                    |
| K356R                                                   | As above <sup>59</sup>                                                                                                            | 38/38 had K                           | 88/91 had R                                                                                                        |
| S409N                                                   | As above <sup>59</sup>                                                                                                            | 5/38 had S<br>33/38 had N             | 90/91 had N<br>1/91 had S                                                                                          |
| <b>HA</b>                                               |                                                                                                                                   |                                       |                                                                                                                    |
| T200A (H3 numbering)                                    | Increased receptor binding affinity to the $\alpha$ 2.6-linked sialic acid for H1N1pdm09 viruses <sup>79</sup>                    | 1/78 had A                            | 48/48 had A                                                                                                        |
| E190D (H3 numbering)                                    | change in receptor specificity of avian IAV from $\alpha$ 2.3-linked sialic acid to $\alpha$ 2.6-linked sialic acid <sup>78</sup> | 73/78<br>5/78 had V or S              | 40/48<br>8/48 had S or G (all Hu-L)                                                                                |
| G225D (H3 numbering)                                    | As above <sup>78</sup>                                                                                                            | 6/78<br>63/78 had E<br>9/78 had T/K/N | 18/48 (14/18 was Hu-L)<br>23/48 had N<br>1/48 had G                                                                |
| K159, G172E, I183V, S200P, S202N, D204S, V338I and V66I | Related to the H1pdmN2sw subtype in Germany <sup>27</sup>                                                                         |                                       | Not specific for H1pdmN2sw. However, I173V and V466I were present in 3/12 and 1/12 of the Danish H1pdmN2sw viruses |
| <b>NP</b>                                               |                                                                                                                                   |                                       |                                                                                                                    |
| K48Q                                                    | Confer MxA resistance in combination with R98K and R99K for the NP protein of                                                     | 35/35 had Q                           | 92/92 had K                                                                                                        |

|         | avian-like swine origin <sup>60</sup>                                                                                                                     |                           |                                                                       |
|---------|-----------------------------------------------------------------------------------------------------------------------------------------------------------|---------------------------|-----------------------------------------------------------------------|
| E53D    | Confer MxA resistance for the NP protein of H1N1pdm09 origin <sup>61</sup>                                                                                | 35/35 had E               | 10/92 had D (8/10 were H1pdmNx viruses belonging to the Hu-L cluster) |
| R98K    | Confer MxA resistance in combination with K48Q and R99K for the NP protein of avian-like swine origin <sup>60</sup>                                       | 33/35 had K               | 92/92 had R                                                           |
| R99K    | Confer MxA resistance in combination with K48Q and R98K for the NP protein of avian-like swine origin <sup>60</sup>                                       | 31/35 had K               | 90/92 had R                                                           |
| R100I/V | Confer MxA resistance for the NP protein of H1N1pdm09 origin <sup>61</sup> and dominant residue differ between avian- and H1N1pdm09 viruses <sup>59</sup> | 35/35 had R               | 84/92 had I<br>3/92 had M<br>3/92 had V<br>2/92 T/L                   |
| F313V   | Confer MxA resistance for the NP protein of H1N1pdm09 origin <sup>61</sup>                                                                                | 35/35 had F               | 91/92 had V                                                           |
| V33I    | Dominant residue differ between avian- and H1N1pdm09 viruses <sup>59</sup>                                                                                | 8/35 had V<br>27/35 had I | 91/92 had I<br>1/92 had V                                             |
| R100V   | As above <sup>59</sup>                                                                                                                                    |                           |                                                                       |
| R305K   | As above <sup>59</sup>                                                                                                                                    | 35/35 had R               | 91/92 had K<br>1/92 had R                                             |
| Q357K   | As above <sup>59</sup>                                                                                                                                    | 35/35 had Q               | 92/92 had K                                                           |

22 Aa positions are numbered according to the first methionine if nothing else is indicated.

23

24 Supplementary table 4 - Amino acid differences in the internal proteins of the Hu-L and Sw-L H1pdm  
25 sequences

| Protein | Aa change Hu-L → Sw-L | Prevalence in the Hu-L sequences | Prevalence in the Sw-L sequences |
|---------|-----------------------|----------------------------------|----------------------------------|
| PB2     | T76A                  | 1/18                             | 22/30                            |
|         | M283I                 | 0                                | 27/30                            |
|         | V359M                 | 6/18                             | 27/30                            |
|         | N456S                 | 4/18                             | 25/30                            |
| PB1     | T110A                 | 2/16                             | 27/30                            |
|         | M317I                 | 3/16                             | 29/30                            |
| NS      | V117M                 | 0/18                             | 24/30                            |
| PA      | C241Y                 | 5/18                             | 28/30                            |
| NP      | R212L                 | 0/18                             | 27/30                            |

26 Aa positions are numbered according to the first methionine

27

28 **Supplementary figures**

29 **Supplementary figure 1 – Monthly distribution of swIAV submissions 2011-2018.**

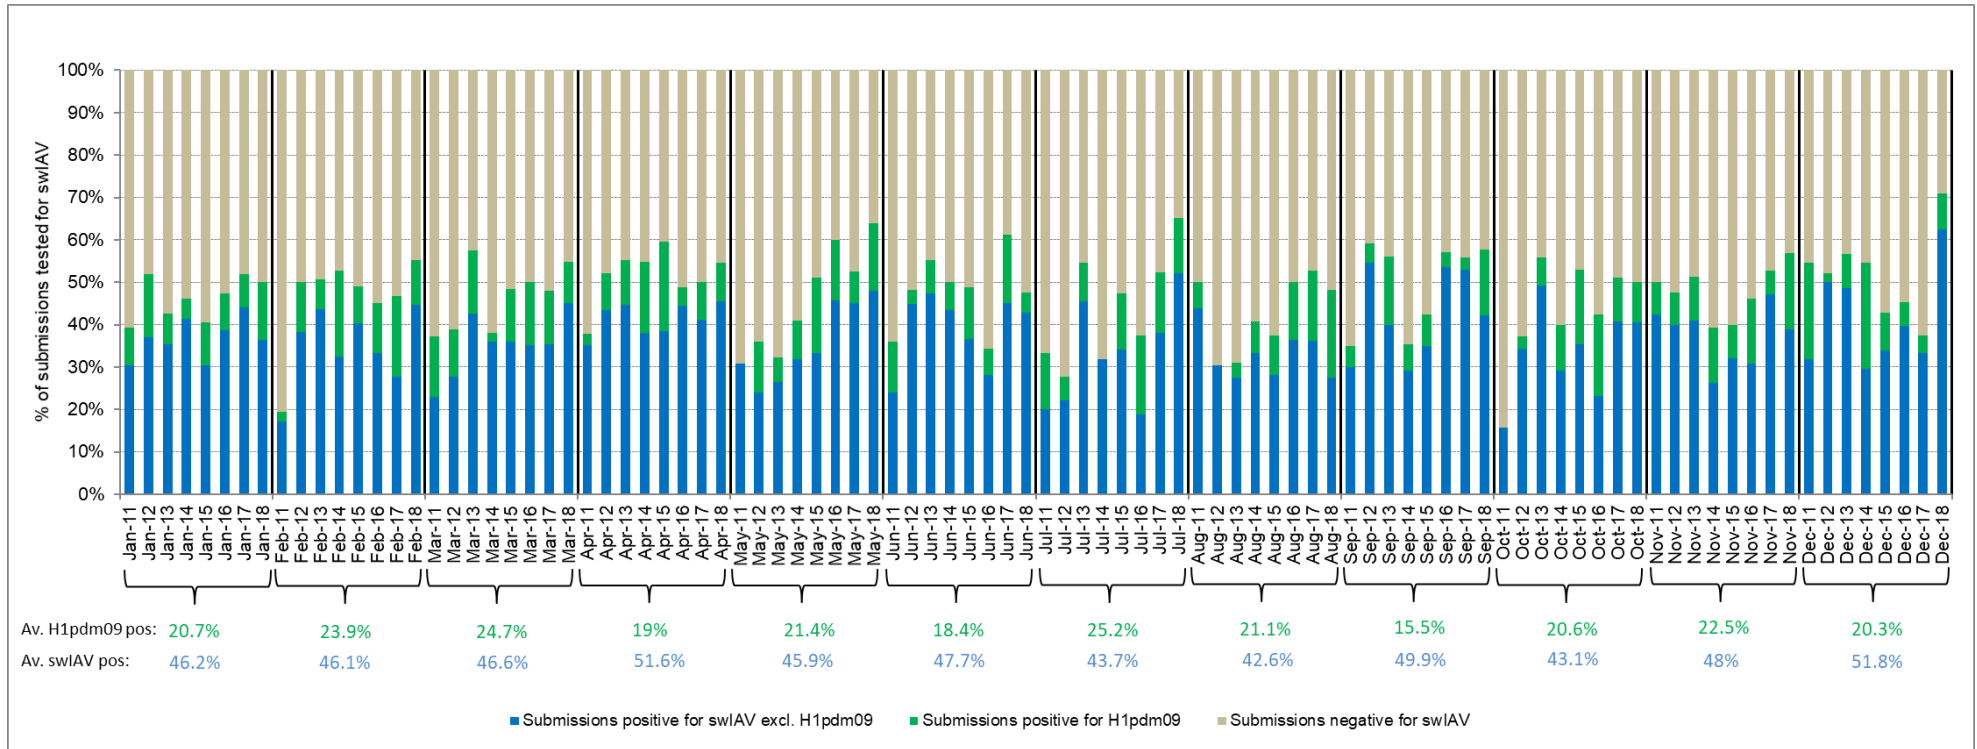

30

31 The average percentage of swIAV positive and H1pdm09 positive over the eight year surveillance period is indicated below each representative month  
 32 in blue and green, respectively.

33

34

35

Supplementary Figure 2 – strict molecular clock tree of the H1av nucleotide sequences

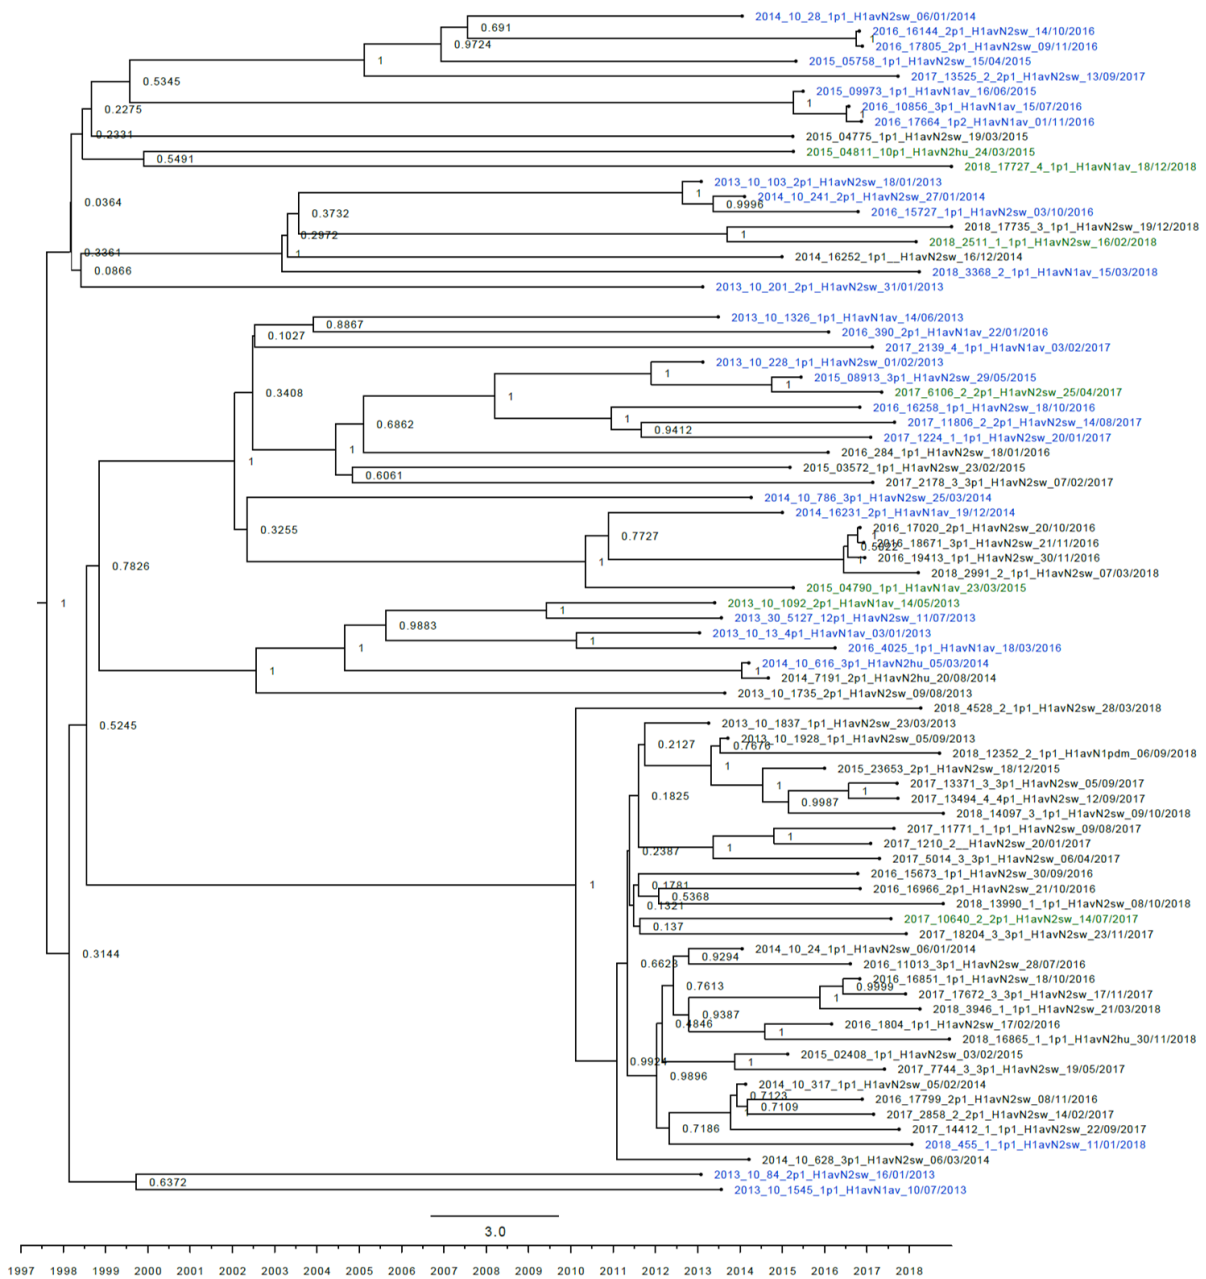

The x-axis indicates the time in years and each tick indicates half a year. A blue taxon indicates that the sample carried an internal gene cassette of avian origin, whereas a green taxon indicates that the sample carried a partial internal gene cassette of H1N1pdm9 origin. A black taxon indicates that the sample carried an internal gene cassette of H1N1pdm9 origin. The x-axis represents time in years.

### Supplementary Figure 3 – Bayesian phylogenetic tree of the H1pdm nucleotide sequences

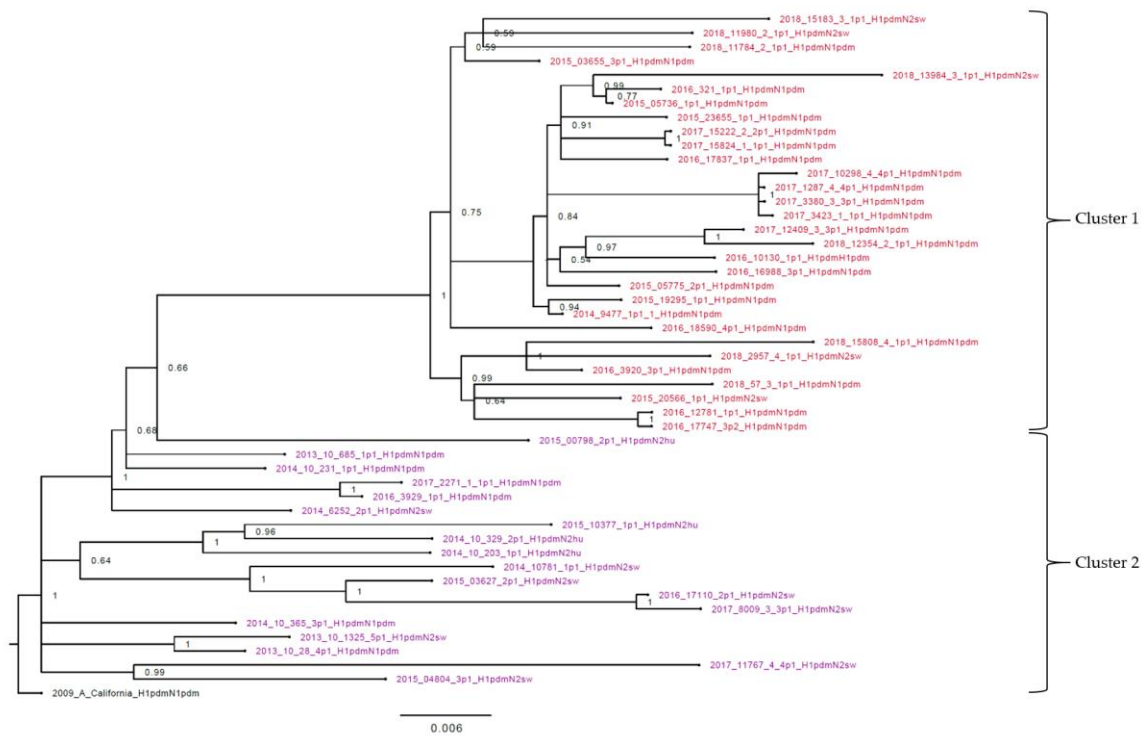

Node labels indicate posterior probabilities. “2009\_A\_California” is the outgroup. A red taxon indicate that the sequence is part of Cluster 1 and a purple taxon indicates that the sequence is part Cluster 2.



Supplementary Figure 4 – Strict molecular clock tree of the N1pdm sequences

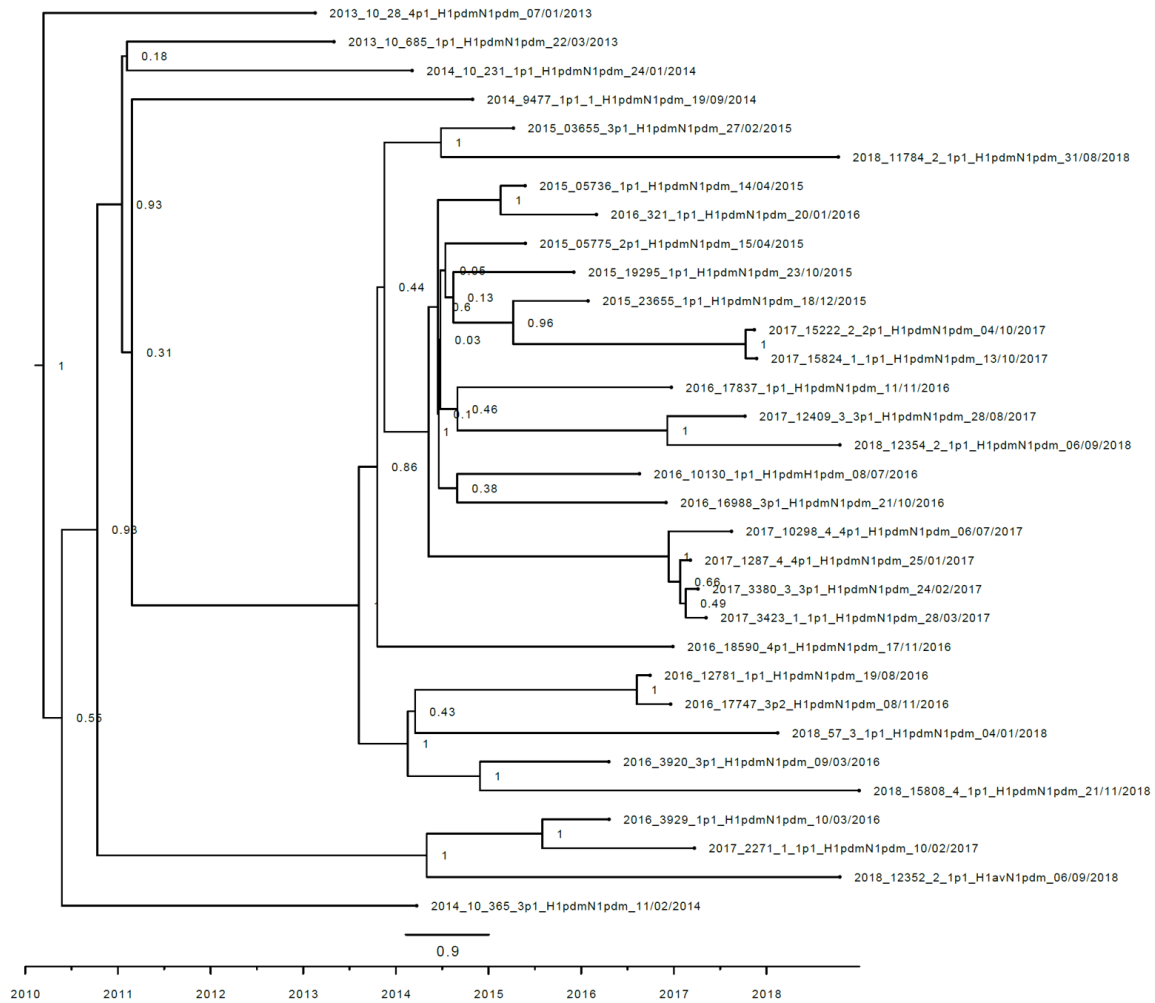

The x-axis indicates the time in years and each tick indicates half a year. A black taxon indicates that the sample carried an internal gene cassette of H1N1pdm9 origin.

### Supplementary figure 5 – Strict molecular clock tree of the N1av sequences

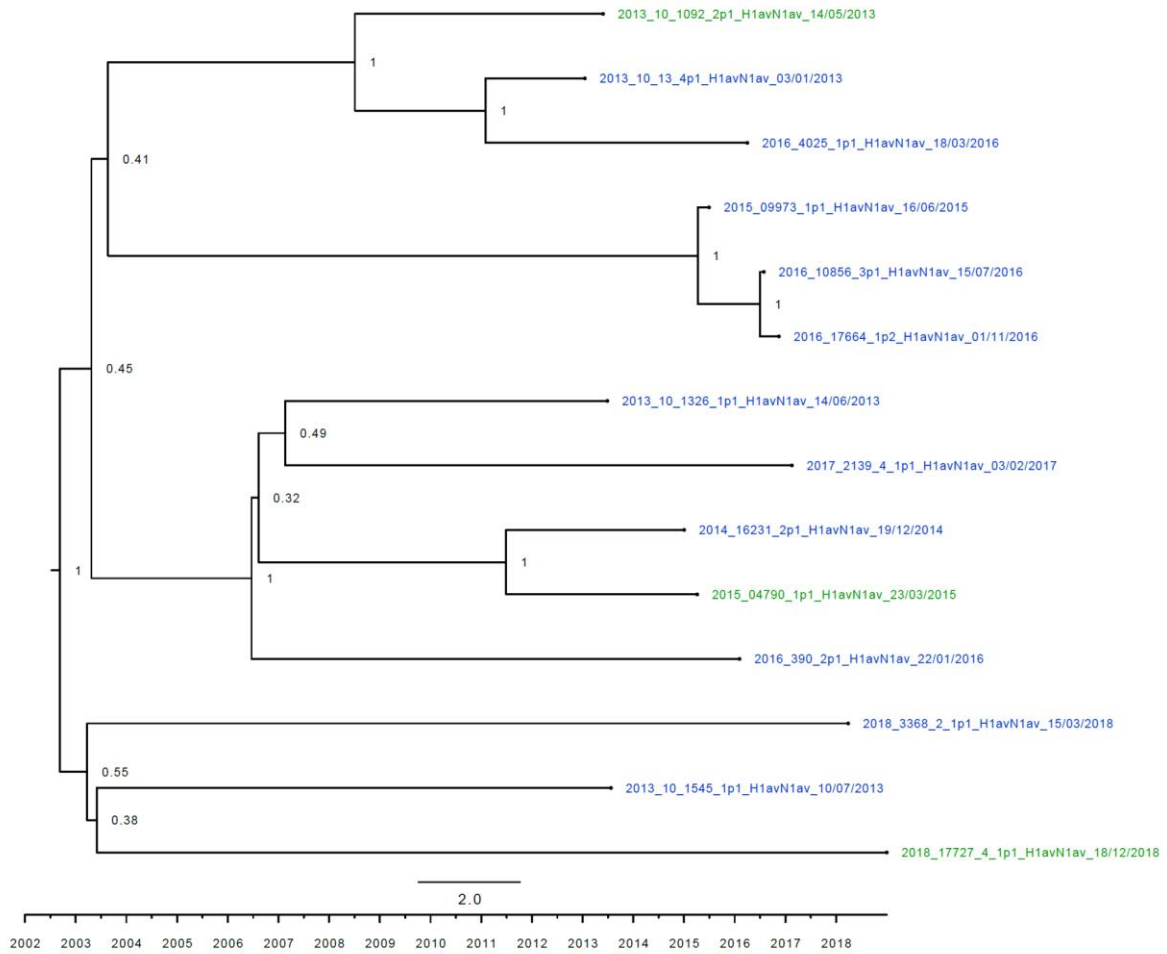

The x-axis indicates the time in years and each tick indicates half a year. A blue taxon indicates that the sample carried an internal gene cassette of avian origin, whereas a green taxon indicates that the sample carried a partial internal gene cassette of H1N1pdm09 origin.

Supplementary figure 6 – Strict molecular clock tree of the N2sw sequences

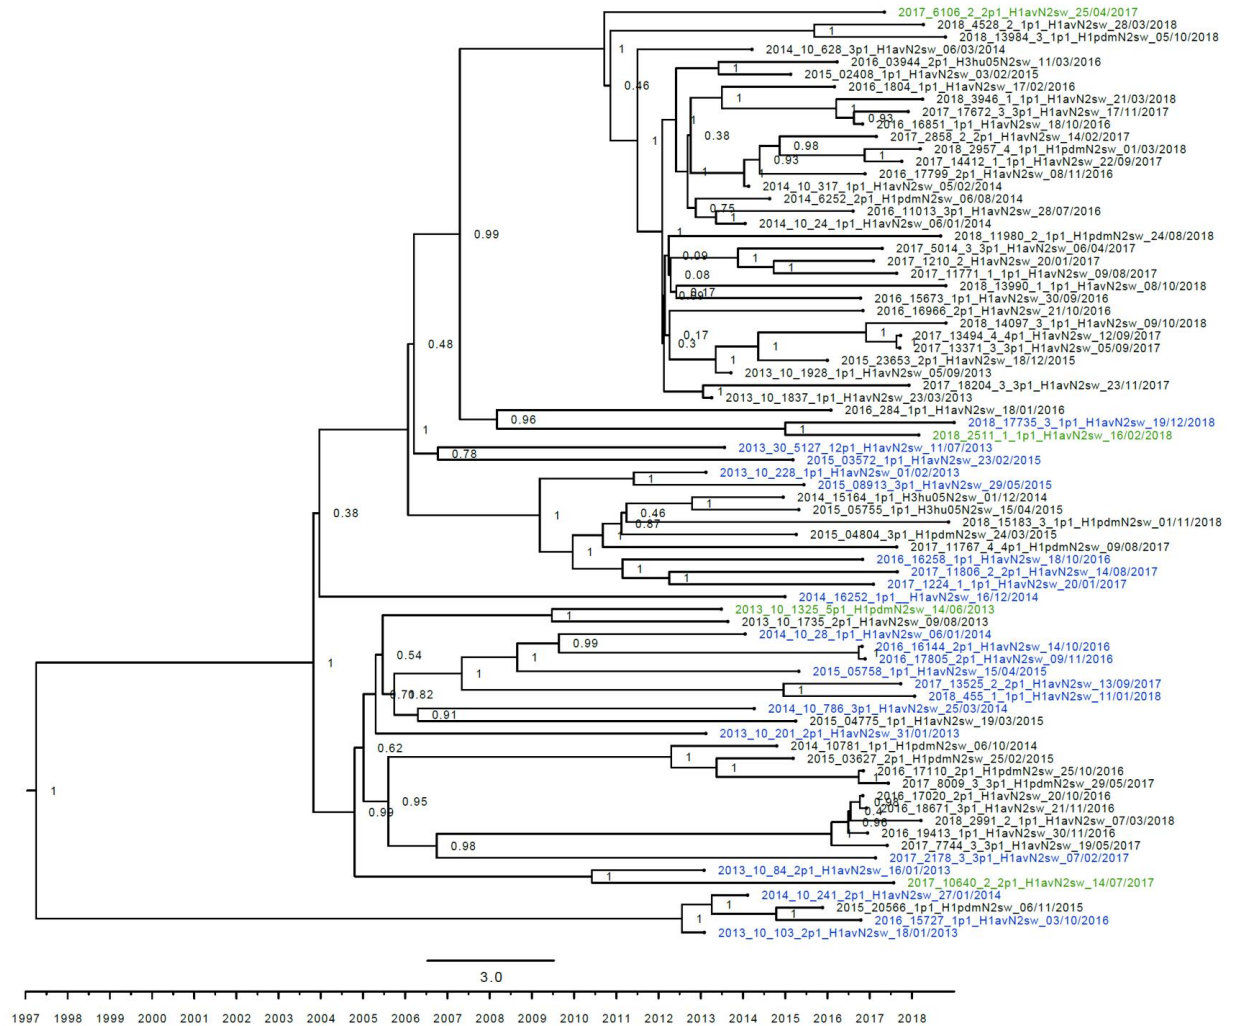

The x-axis indicates the time in years and each tick indicates half a year. A blue taxon indicates that the sample carried an internal gene cassette of avian origin, whereas a green taxon indicates that the sample carried a partial internal gene cassette of H1N1pdm09 origin. A black taxon indicates that the sample carried an internal gene cassette of H1N1pdm09 origin.

### Supplementary figure 7 – Strict molecular clock tree of the N2hu sequences

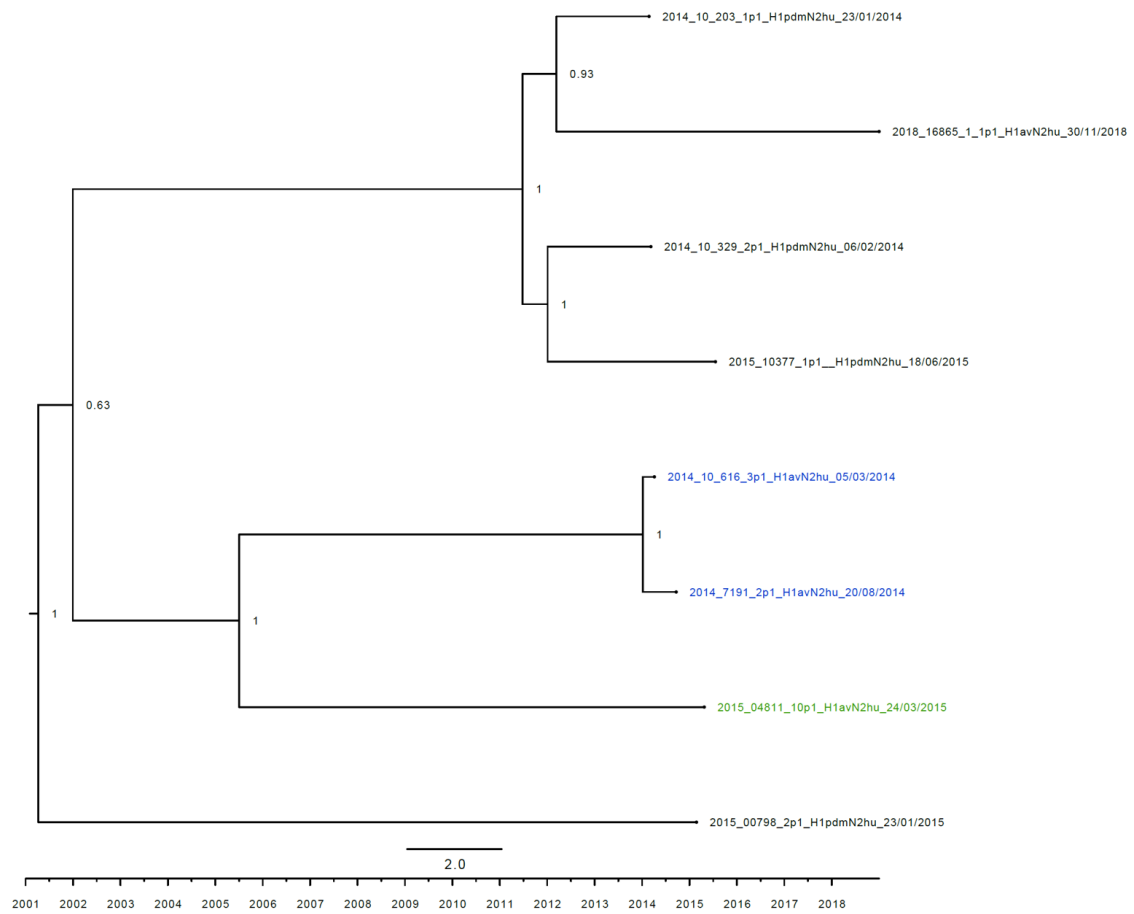

The x-axis indicates the time in years and each tick indicates half a year. A blue taxon indicates that the sample carried an internal gene cassette of avian origin, whereas a green taxon indicates that the sample carried a partial internal gene cassette of H1N1pdm09 origin. A black taxon indicates that the sample carried an internal gene cassette of H1N1pdm09 origin.









Supplementary figure 11 – Bayesian phylogenetic tree of the PA sequences

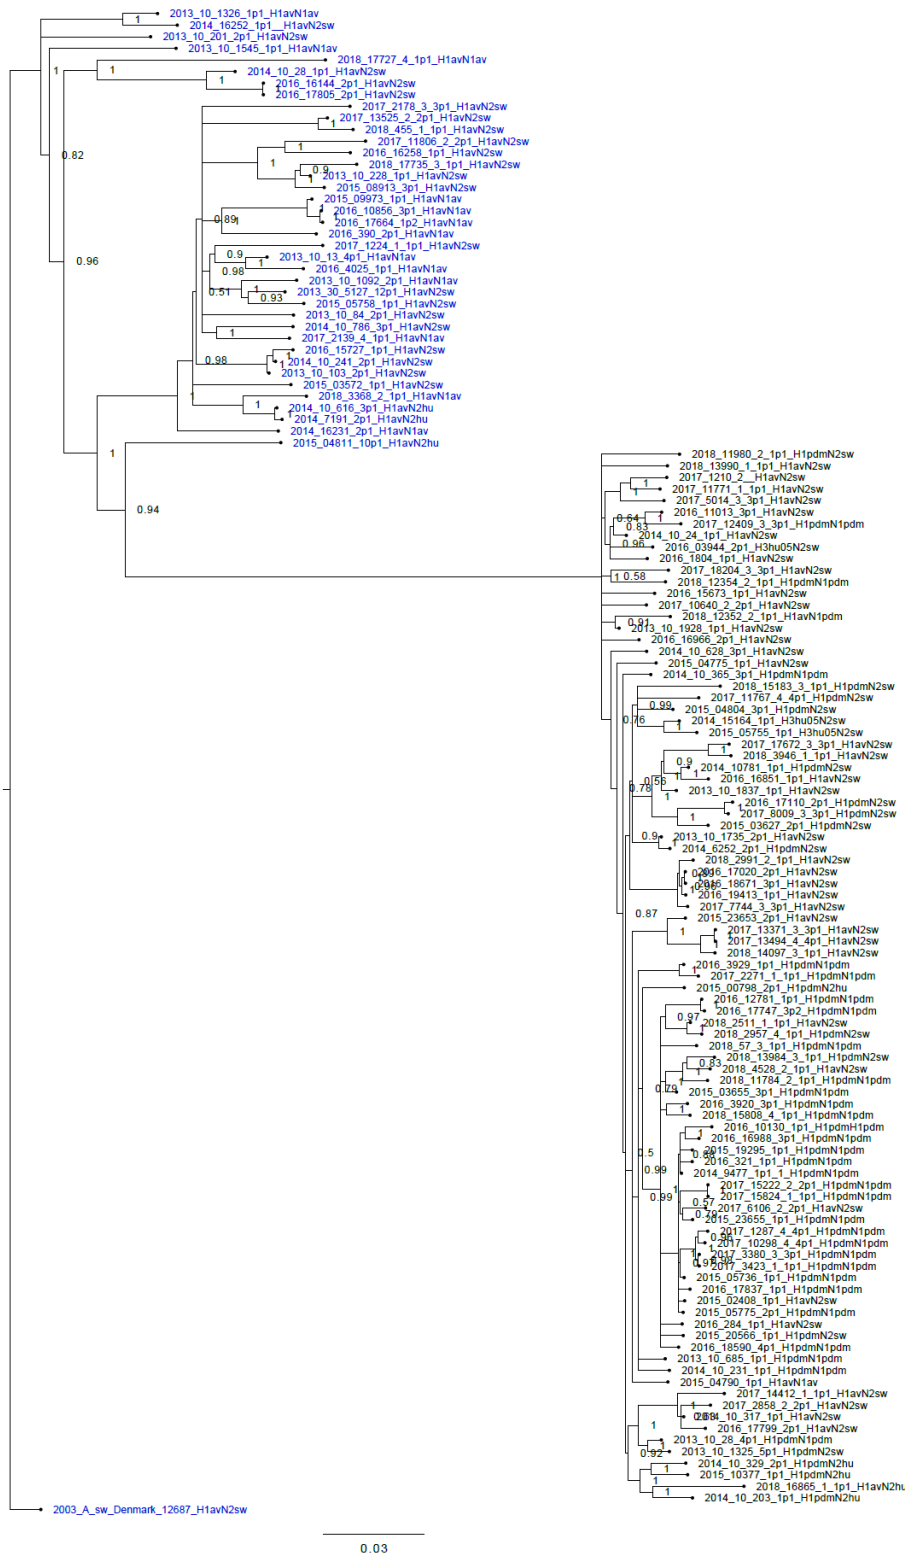

“2003\_A\_sw\_Denmark\_12687” was used as the outgroup. A blue taxon indicates that the PA gene of the sample is of avian-like origin, whereas the a black taxon indicates that the PA gene of the sample is of H1N1pmd09 origin.



### Supplementary figure 13 – Bayesian phylogenetic tree of the PB2 sequences

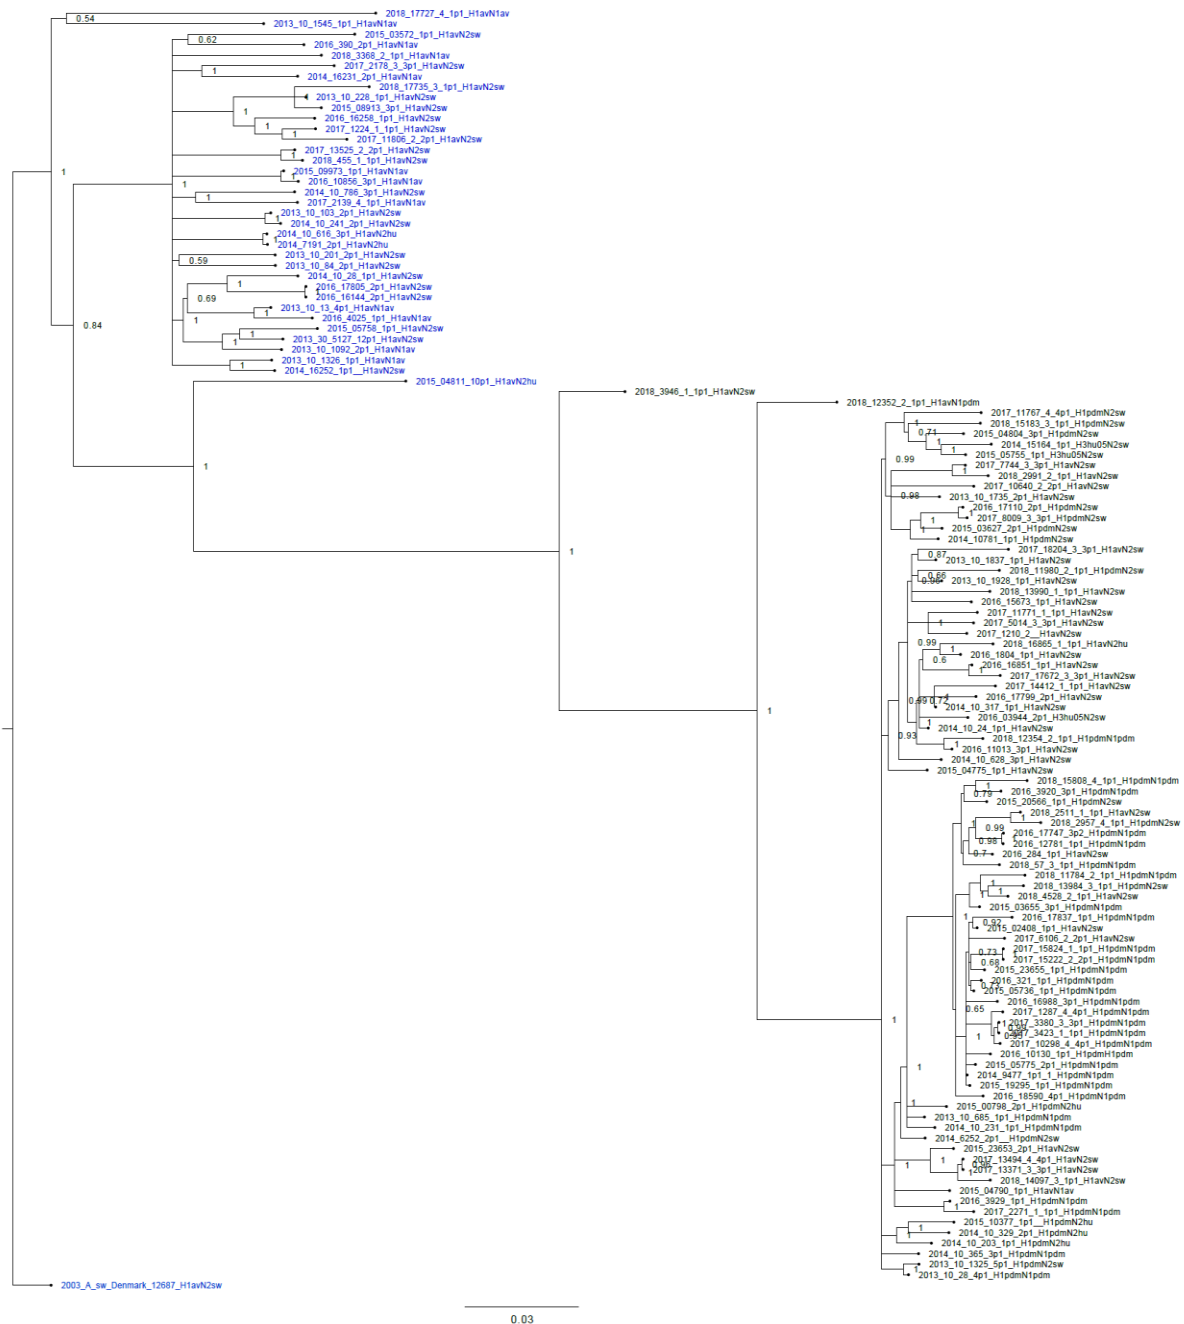

“2003\_A\_sw\_Denmark\_12687” was used as the outgroup. A blue taxon indicates that the PB2 gene of the sample is of avian-like origin, whereas the a black taxon indicates that the PB2 gene of the sample is of H1N1pdm09 origin.
